# Supplementary material for: Single-cell transcriptomics reveals functionally specialized vascular endothelium in brain
Source: eLife. 2022 Oct 5;11:e57520. doi: 10.7554/eLife.57520 (PMC9566870; doi:10.7554/eLife.57520)
Supplement: Figure 1—source data 1. [file elife-57520-fig1-data1.xlsx]

## Sheet: Clusters-table_by_sample (1)
	Figure 1-source data
	Source data for Figure 1C
	Frequency of cell types for each age
	sample	Clusters	count	freq
1	1_Juvenile	EC	3166	0.293257
2	1_Juvenile	Micro	3726	0.345128
3	1_Juvenile	Astro	1922	0.178029
4	1_Juvenile	PVM	650	0.0602075
5	1_Juvenile	Mural	527	0.0488144
6	1_Juvenile	Fibro	805	0.0745647
	1_Juvenile	Total	10796
7	2_Adult	EC	5006	0.507142
8	2_Adult	Micro	944	0.0956337
9	2_Adult	Astro	2866	0.290345
10	2_Adult	PVM	574	0.0581501
11	2_Adult	Mural	423	0.0428528
12	2_Adult	Fibro	58	0.0058758
	2_Adult	Total	9871
13	3_Aged	EC	5780	0.661403
14	3_Aged	Micro	1177	0.134684
15	3_Aged	Astro	856	0.0979517
16	3_Aged	PVM	575	0.065797
17	3_Aged	Mural	275	0.0314681
18	3_Aged	Fibro	76	0.00869665
	3_Aged	Total	8739
		All	29406
