# Supplementary material for: Single-cell transcriptomics reveals functionally specialized vascular endothelium in brain
Source: eLife. 2022 Oct 5;11:e57520. doi: 10.7554/eLife.57520 (PMC9566870; doi:10.7554/eLife.57520)
Supplement: Figure 2—figure supplement 3—source data 1. [file elife-57520-fig2-figsupp3-data1.xlsx]

## Sheet: Sheet1
	Figure 2-figure supplement 3-source data 1
	Source data for Figure 2-figure supplement 3E
	Quantification of ICAM-1+ vessel diameter in brain cortical parenchyma.
	P10-1											P50-1
	ID	Item Name	Name	Population	Timepoint	Abs. Time	Rel. Time (s)	Type	Total Line Length (µm)			ID	Item Name	Name	Population	Timepoint	Abs. Time	Rel. Time (s)	Type	Total Line Length (µm)
	20	TileScan_001_Merging001 (Tile 27)	Lines 20	Lines	1	00:00:00	0	Line	4.81			33	Snapshot of TileScan_002_Merging001	Lines 33	Lines	1	16:43:10.793 on 18/02/2019	0	Line	4.79
	21	TileScan_001_Merging001 (Tile 27)	Lines 21	Lines	1	00:00:00	0	Line	4.85			25	Snapshot of TileScan_002_Merging001	Lines 25	Lines	1	16:43:10.793 on 18/02/2019	0	Line	6.77
	12	TileScan_001_Merging001 (Tile 27)	Lines 12	Lines	1	00:00:00	0	Line	5.08			36	Snapshot of TileScan_002_Merging001	Lines 36	Lines	1	16:43:10.793 on 18/02/2019	0	Line	7.57
	9	TileScan_001_Merging001 (Tile 27)	Lines 9	Lines	1	00:00:00	0	Line	6.42			24	Snapshot of TileScan_002_Merging001	Lines 24	Lines	1	16:43:10.793 on 18/02/2019	0	Line	8.15
	15	TileScan_001_Merging001 (Tile 27)	Lines 15	Lines	1	00:00:00	0	Line	6.81			8	Snapshot of TileScan_002_Merging001	Lines 8	Lines	1	16:43:10.793 on 18/02/2019	0	Line	8.83
	17	TileScan_001_Merging001 (Tile 27)	Lines 17	Lines	1	00:00:00	0	Line	6.81			13	Snapshot of TileScan_002_Merging001	Lines 13	Lines	1	16:43:10.793 on 18/02/2019	0	Line	8.83
	18	TileScan_001_Merging001 (Tile 27)	Lines 18	Lines	1	00:00:00	0	Line	6.81			26	Snapshot of TileScan_002_Merging001	Lines 26	Lines	1	16:43:10.793 on 18/02/2019	0	Line	9.21
	19	TileScan_001_Merging001 (Tile 27)	Lines 19	Lines	1	00:00:00	0	Line	6.81			14	Snapshot of TileScan_002_Merging001	Lines 14	Lines	1	16:43:10.793 on 18/02/2019	0	Line	9.58
	16	TileScan_001_Merging001 (Tile 27)	Lines 16	Lines	1	00:00:00	0	Line	7.18			31	Snapshot of TileScan_002_Merging001	Lines 31	Lines	1	16:43:10.793 on 18/02/2019	0	Line	9.58
	5	TileScan_001_Merging001 (Tile 27)	Lines 5	Lines	1	00:00:00	0	Line	8.19			35	Snapshot of TileScan_002_Merging001	Lines 35	Lines	1	16:43:10.793 on 18/02/2019	0	Line	9.69
	7	TileScan_001_Merging001 (Tile 27)	Lines 7	Lines	1	00:00:00	0	Line	8.19			30	Snapshot of TileScan_002_Merging001	Lines 30	Lines	1	16:43:10.793 on 18/02/2019	0	Line	10.6
	8	TileScan_001_Merging001 (Tile 27)	Lines 8	Lines	1	00:00:00	0	Line	8.19			2	Snapshot of TileScan_002_Merging001	Lines 2	Lines	1	16:43:10.793 on 18/02/2019	0	Line	10.92
	13	TileScan_001_Merging001 (Tile 27)	Lines 13	Lines	1	00:00:00	0	Line	8.19			7	Snapshot of TileScan_002_Merging001	Lines 7	Lines	1	16:43:10.793 on 18/02/2019	0	Line	12.94
	14	TileScan_001_Merging001 (Tile 27)	Lines 14	Lines	1	00:00:00	0	Line	8.19			6	Snapshot of TileScan_002_Merging001	Lines 6	Lines	1	16:43:10.793 on 18/02/2019	0	Line	13.02
	10	TileScan_001_Merging001 (Tile 27)	Lines 10	Lines	1	00:00:00	0	Line	10.16			19	Snapshot of TileScan_002_Merging001	Lines 19	Lines	1	16:43:10.793 on 18/02/2019	0	Line	13.96
	2	TileScan_001_Merging001 (Tile 27)	Lines 2	Lines	1	00:00:00	0	Line	12.85			3	Snapshot of TileScan_002_Merging001	Lines 3	Lines	1	16:43:10.793 on 18/02/2019	0	Line	14.28
	1	TileScan_001_Merging001 (Tile 27)	Lines 1	Lines	1	00:00:00	0	Line	13.24			28	Snapshot of TileScan_002_Merging001	Lines 28	Lines	1	16:43:10.793 on 18/02/2019	0	Line	14.28
	3	TileScan_001_Merging001 (Tile 27)	Lines 3	Lines	1	00:00:00	0	Line	16.38			27	Snapshot of TileScan_002_Merging001	Lines 27	Lines	1	16:43:10.793 on 18/02/2019	0	Line	14.99
	11	TileScan_001_Merging001 (Tile 27)	Lines 11	Lines	1	00:00:00	0	Line	16.38			11	Snapshot of TileScan_002_Merging001	Lines 11	Lines	1	16:43:10.793 on 18/02/2019	0	Line	15.14
	4	TileScan_001_Merging001 (Tile 27)	Lines 4	Lines	1	00:00:00	0	Line	19.54			10	Snapshot of TileScan_002_Merging001	Lines 10	Lines	1	16:43:10.793 on 18/02/2019	0	Line	16.31
	6	TileScan_001_Merging001 (Tile 27)	Lines 6	Lines	1	00:00:00	0	Line	21.55			32	Snapshot of TileScan_002_Merging001	Lines 32	Lines	1	16:43:10.793 on 18/02/2019	0	Line	17.72
												22	Snapshot of TileScan_002_Merging001	Lines 22	Lines	1	16:43:10.793 on 18/02/2019	0	Line	18.17
	P10-2											4	Snapshot of TileScan_002_Merging001	Lines 4	Lines	1	16:43:10.793 on 18/02/2019	0	Line	19.91
	ID	Item Name	Name	Population	Timepoint	Abs. Time	Rel. Time (s)	Type	Total Line Length (µm)			21	Snapshot of TileScan_002_Merging001	Lines 21	Lines	1	16:43:10.793 on 18/02/2019	0	Line	21.03
	51	Snapshot of TileScan_003_Merging001	Lines 51	Lines	1	15:28:51.045 on 19/02/2019	0	Line	3.03			29	Snapshot of TileScan_002_Merging001	Lines 29	Lines	1	16:43:10.793 on 18/02/2019	0	Line	24.46
	1	Snapshot of TileScan_003_Merging001	Lines 1	Lines	1	15:28:51.045 on 19/02/2019	0	Line	3.39			16	Snapshot of TileScan_002_Merging001	Lines 16	Lines	1	16:43:10.793 on 18/02/2019	0	Line	27.29
	3	Snapshot of TileScan_003_Merging001	Lines 3	Lines	1	15:28:51.045 on 19/02/2019	0	Line	3.39			12	Snapshot of TileScan_002_Merging001	Lines 12	Lines	1	16:43:10.793 on 18/02/2019	0	Line	31.83
	31	Snapshot of TileScan_003_Merging001	Lines 31	Lines	1	15:28:51.045 on 19/02/2019	0	Line	4.54			17	Snapshot of TileScan_002_Merging001	Lines 17	Lines	1	16:43:10.793 on 18/02/2019	0	Line	33.24
	11	Snapshot of TileScan_003_Merging001	Lines 11	Lines	1	15:28:51.045 on 19/02/2019	0	Line	4.79			15	Snapshot of TileScan_002_Merging001	Lines 15	Lines	1	16:43:10.793 on 18/02/2019	0	Line	34.02
	21	Snapshot of TileScan_003_Merging001	Lines 21	Lines	1	15:28:51.045 on 19/02/2019	0	Line	4.79			5	Snapshot of TileScan_002_Merging001	Lines 5	Lines	1	16:43:10.793 on 18/02/2019	0	Line	37.85
	48	Snapshot of TileScan_003_Merging001	Lines 48	Lines	1	15:28:51.045 on 19/02/2019	0	Line	4.79			1	Snapshot of TileScan_002_Merging001	Lines 1	Lines	1	16:43:10.793 on 18/02/2019	0	Line	47.15
	53	Snapshot of TileScan_003_Merging001	Lines 53	Lines	1	15:28:51.045 on 19/02/2019	0	Line	4.79			20	Snapshot of TileScan_002_Merging001	Lines 20	Lines	1	16:43:10.793 on 18/02/2019	0	Line	47.8
	2	Snapshot of TileScan_003_Merging001	Lines 2	Lines	1	15:28:51.045 on 19/02/2019	0	Line	5.46			9	Snapshot of TileScan_002_Merging001	Lines 9	Lines	1	16:43:10.793 on 18/02/2019	0	Line	50.53
	16	Snapshot of TileScan_003_Merging001	Lines 16	Lines	1	15:28:51.045 on 19/02/2019	0	Line	5.46			18	Snapshot of TileScan_002_Merging001	Lines 18	Lines	1	16:43:10.793 on 18/02/2019	0	Line	54.61
	27	Snapshot of TileScan_003_Merging001	Lines 27	Lines	1	15:28:51.045 on 19/02/2019	0	Line	5.46			23	Snapshot of TileScan_002_Merging001	Lines 23	Lines	1	16:43:10.793 on 18/02/2019	0	Line	57.71
	42	Snapshot of TileScan_003_Merging001	Lines 42	Lines	1	15:28:51.045 on 19/02/2019	0	Line	5.46			34	Snapshot of TileScan_002_Merging001	Lines 34	Lines	1	16:43:10.793 on 18/02/2019	0	Line	62.09
	45	Snapshot of TileScan_003_Merging001	Lines 45	Lines	1	15:28:51.045 on 19/02/2019	0	Line	5.46
	15	Snapshot of TileScan_003_Merging001	Lines 15	Lines	1	15:28:51.045 on 19/02/2019	0	Line	6.06			P50-2
	41	Snapshot of TileScan_003_Merging001	Lines 41	Lines	1	15:28:51.045 on 19/02/2019	0	Line	6.06			ID	Item Name	Name	Population	Timepoint	Abs. Time	Rel. Time (s)	Type	Total Line Length (µm)
	6	Snapshot of TileScan_003_Merging001	Lines 6	Lines	1	15:28:51.045 on 19/02/2019	0	Line	6.24			3	Snapshot of TileScan_001_Merging001	Lines 3	Lines	1	14:31:39.541 on 19/02/2019	0	Line	5.46
	8	Snapshot of TileScan_003_Merging001	Lines 8	Lines	1	15:28:51.045 on 19/02/2019	0	Line	6.24			4	Snapshot of TileScan_001_Merging001	Lines 4	Lines	1	14:31:39.541 on 19/02/2019	0	Line	6.77
	22	Snapshot of TileScan_003_Merging001	Lines 22	Lines	1	15:28:51.045 on 19/02/2019	0	Line	6.42			22	Snapshot of TileScan_001_Merging001	Lines 22	Lines	1	14:31:39.541 on 19/02/2019	0	Line	6.77
	23	Snapshot of TileScan_003_Merging001	Lines 23	Lines	1	15:28:51.045 on 19/02/2019	0	Line	6.77			23	Snapshot of TileScan_001_Merging001	Lines 23	Lines	1	14:31:39.541 on 19/02/2019	0	Line	7.57
	30	Snapshot of TileScan_003_Merging001	Lines 30	Lines	1	15:28:51.045 on 19/02/2019	0	Line	6.77			26	Snapshot of TileScan_001_Merging001	Lines 26	Lines	1	14:31:39.541 on 19/02/2019	0	Line	7.57
	5	Snapshot of TileScan_003_Merging001	Lines 5	Lines	1	15:28:51.045 on 19/02/2019	0	Line	7.57			36	Snapshot of TileScan_001_Merging001	Lines 36	Lines	1	14:31:39.541 on 19/02/2019	0	Line	7.57
	24	Snapshot of TileScan_003_Merging001	Lines 24	Lines	1	15:28:51.045 on 19/02/2019	0	Line	7.57			13	Snapshot of TileScan_001_Merging001	Lines 13	Lines	1	14:31:39.541 on 19/02/2019	0	Line	9.58
	26	Snapshot of TileScan_003_Merging001	Lines 26	Lines	1	15:28:51.045 on 19/02/2019	0	Line	7.57			6	Snapshot of TileScan_001_Merging001	Lines 6	Lines	1	14:31:39.541 on 19/02/2019	0	Line	9.69
	49	Snapshot of TileScan_003_Merging001	Lines 49	Lines	1	15:28:51.045 on 19/02/2019	0	Line	7.57			15	Snapshot of TileScan_001_Merging001	Lines 15	Lines	1	14:31:39.541 on 19/02/2019	0	Line	9.69
	54	Snapshot of TileScan_003_Merging001	Lines 54	Lines	1	15:28:51.045 on 19/02/2019	0	Line	7.57			7	Snapshot of TileScan_001_Merging001	Lines 7	Lines	1	14:31:39.541 on 19/02/2019	0	Line	10.16
	60	Snapshot of TileScan_003_Merging001	Lines 60	Lines	1	15:28:51.045 on 19/02/2019	0	Line	7.57			29	Snapshot of TileScan_001_Merging001	Lines 29	Lines	1	14:31:39.541 on 19/02/2019	0	Line	10.16
	7	Snapshot of TileScan_003_Merging001	Lines 7	Lines	1	15:28:51.045 on 19/02/2019	0	Line	7.72			5	Snapshot of TileScan_001_Merging001	Lines 5	Lines	1	14:31:39.541 on 19/02/2019	0	Line	10.6
	14	Snapshot of TileScan_003_Merging001	Lines 14	Lines	1	15:28:51.045 on 19/02/2019	0	Line	7.72			8	Snapshot of TileScan_001_Merging001	Lines 8	Lines	1	14:31:39.541 on 19/02/2019	0	Line	10.71
	29	Snapshot of TileScan_003_Merging001	Lines 29	Lines	1	15:28:51.045 on 19/02/2019	0	Line	7.72			11	Snapshot of TileScan_001_Merging001	Lines 11	Lines	1	14:31:39.541 on 19/02/2019	0	Line	10.71
	33	Snapshot of TileScan_003_Merging001	Lines 33	Lines	1	15:28:51.045 on 19/02/2019	0	Line	7.72			17	Snapshot of TileScan_001_Merging001	Lines 17	Lines	1	14:31:39.541 on 19/02/2019	0	Line	10.71
	39	Snapshot of TileScan_003_Merging001	Lines 39	Lines	1	15:28:51.045 on 19/02/2019	0	Line	7.72			25	Snapshot of TileScan_001_Merging001	Lines 25	Lines	1	14:31:39.541 on 19/02/2019	0	Line	10.71
	44	Snapshot of TileScan_003_Merging001	Lines 44	Lines	1	15:28:51.045 on 19/02/2019	0	Line	7.72			24	Snapshot of TileScan_001_Merging001	Lines 24	Lines	1	14:31:39.541 on 19/02/2019	0	Line	11.02
	58	Snapshot of TileScan_003_Merging001	Lines 58	Lines	1	15:28:51.045 on 19/02/2019	0	Line	8.15			14	Snapshot of TileScan_001_Merging001	Lines 14	Lines	1	14:31:39.541 on 19/02/2019	0	Line	11.53
	47	Snapshot of TileScan_003_Merging001	Lines 47	Lines	1	15:28:51.045 on 19/02/2019	0	Line	8.56			20	Snapshot of TileScan_001_Merging001	Lines 20	Lines	1	14:31:39.541 on 19/02/2019	0	Line	12.21
	13	Snapshot of TileScan_003_Merging001	Lines 13	Lines	1	15:28:51.045 on 19/02/2019	0	Line	8.83			12	Snapshot of TileScan_001_Merging001	Lines 12	Lines	1	14:31:39.541 on 19/02/2019	0	Line	13.02
	20	Snapshot of TileScan_003_Merging001	Lines 20	Lines	1	15:28:51.045 on 19/02/2019	0	Line	8.83			21	Snapshot of TileScan_001_Merging001	Lines 21	Lines	1	14:31:39.541 on 19/02/2019	0	Line	13.54
	28	Snapshot of TileScan_003_Merging001	Lines 28	Lines	1	15:28:51.045 on 19/02/2019	0	Line	8.83			28	Snapshot of TileScan_001_Merging001	Lines 28	Lines	1	14:31:39.541 on 19/02/2019	0	Line	13.71
	43	Snapshot of TileScan_003_Merging001	Lines 43	Lines	1	15:28:51.045 on 19/02/2019	0	Line	8.83			30	Snapshot of TileScan_001_Merging001	Lines 30	Lines	1	14:31:39.541 on 19/02/2019	0	Line	14.28
	34	Snapshot of TileScan_003_Merging001	Lines 34	Lines	1	15:28:51.045 on 19/02/2019	0	Line	9.08			18	Snapshot of TileScan_001_Merging001	Lines 18	Lines	1	14:31:39.541 on 19/02/2019	0	Line	16.09
	36	Snapshot of TileScan_003_Merging001	Lines 36	Lines	1	15:28:51.045 on 19/02/2019	0	Line	9.08			9	Snapshot of TileScan_001_Merging001	Lines 9	Lines	1	14:31:39.541 on 19/02/2019	0	Line	16.31
	38	Snapshot of TileScan_003_Merging001	Lines 38	Lines	1	15:28:51.045 on 19/02/2019	0	Line	9.08			35	Snapshot of TileScan_001_Merging001	Lines 35	Lines	1	14:31:39.541 on 19/02/2019	0	Line	17.26
	52	Snapshot of TileScan_003_Merging001	Lines 52	Lines	1	15:28:51.045 on 19/02/2019	0	Line	9.08			16	Snapshot of TileScan_001_Merging001	Lines 16	Lines	1	14:31:39.541 on 19/02/2019	0	Line	17.72
	10	Snapshot of TileScan_003_Merging001	Lines 10	Lines	1	15:28:51.045 on 19/02/2019	0	Line	9.21			27	Snapshot of TileScan_001_Merging001	Lines 27	Lines	1	14:31:39.541 on 19/02/2019	0	Line	19.15
	35	Snapshot of TileScan_003_Merging001	Lines 35	Lines	1	15:28:51.045 on 19/02/2019	0	Line	9.21			31	Snapshot of TileScan_001_Merging001	Lines 31	Lines	1	14:31:39.541 on 19/02/2019	0	Line	21.83
	4	Snapshot of TileScan_003_Merging001	Lines 4	Lines	1	15:28:51.045 on 19/02/2019	0	Line	9.69			1	Snapshot of TileScan_001_Merging001	Lines 1	Lines	1	14:31:39.541 on 19/02/2019	0	Line	23.11
	12	Snapshot of TileScan_003_Merging001	Lines 12	Lines	1	15:28:51.045 on 19/02/2019	0	Line	10.16			19	Snapshot of TileScan_001_Merging001	Lines 19	Lines	1	14:31:39.541 on 19/02/2019	0	Line	23.11
	25	Snapshot of TileScan_003_Merging001	Lines 25	Lines	1	15:28:51.045 on 19/02/2019	0	Line	10.16			33	Snapshot of TileScan_001_Merging001	Lines 33	Lines	1	14:31:39.541 on 19/02/2019	0	Line	23.94
	40	Snapshot of TileScan_003_Merging001	Lines 40	Lines	1	15:28:51.045 on 19/02/2019	0	Line	10.16			32	Snapshot of TileScan_001_Merging001	Lines 32	Lines	1	14:31:39.541 on 19/02/2019	0	Line	32.12
	46	Snapshot of TileScan_003_Merging001	Lines 46	Lines	1	15:28:51.045 on 19/02/2019	0	Line	10.16			37	Snapshot of TileScan_001_Merging001	Lines 37	Lines	1	14:31:39.541 on 19/02/2019	0	Line	35.99
	32	Snapshot of TileScan_003_Merging001	Lines 32	Lines	1	15:28:51.045 on 19/02/2019	0	Line	10.6			2	Snapshot of TileScan_001_Merging001	Lines 2	Lines	1	14:31:39.541 on 19/02/2019	0	Line	36.87
	50	Snapshot of TileScan_003_Merging001	Lines 50	Lines	1	15:28:51.045 on 19/02/2019	0	Line	10.6			10	Snapshot of TileScan_001_Merging001	Lines 10	Lines	1	14:31:39.541 on 19/02/2019	0	Line	39.74
	18	Snapshot of TileScan_003_Merging001	Lines 18	Lines	1	15:28:51.045 on 19/02/2019	0	Line	10.92			34	Snapshot of TileScan_001_Merging001	Lines 34	Lines	1	14:31:39.541 on 19/02/2019	0	Line	65.73
	57	Snapshot of TileScan_003_Merging001	Lines 57	Lines	1	15:28:51.045 on 19/02/2019	0	Line	11.82
	9	Snapshot of TileScan_003_Merging001	Lines 9	Lines	1	15:28:51.045 on 19/02/2019	0	Line	12.21
	19	Snapshot of TileScan_003_Merging001	Lines 19	Lines	1	15:28:51.045 on 19/02/2019	0	Line	13.02
	56	Snapshot of TileScan_003_Merging001	Lines 56	Lines	1	15:28:51.045 on 19/02/2019	0	Line	13.02
	37	Snapshot of TileScan_003_Merging001	Lines 37	Lines	1	15:28:51.045 on 19/02/2019	0	Line	16.65
	59	Snapshot of TileScan_003_Merging001	Lines 59	Lines	1	15:28:51.045 on 19/02/2019	0	Line	17.26
	17	Snapshot of TileScan_003_Merging001	Lines 17	Lines	1	15:28:51.045 on 19/02/2019	0	Line	21.83
			P10-1			P10-2
			counts	ratio		counts	ratio
		< 8um	9	42.8571		32	54.2373
		8 - 20 um	11	52.381		26	44.0678
		> 20um	1	4.7619		1	1.69492
			P50-1			P50-2
			counts	ratio		counts	ratio
		< 8um	3	8.33333		6	16.2162
		8 - 20 um	20	55.5556		22	59.4595
		> 20um	13	36.1111		9	24.3243
			P10	Avr ratio	Std
		< 8um		48.5472	8.04698
		8 - 20 um		48.2244	5.87829
		> 20um		3.22841	2.16869
			P50	Avr ratio	Std
		< 8um		12.2748	5.57404
		8 - 20 um		57.5075	2.76048
		> 20um		30.2177	8.33452
