# Supplementary material for: Single-cell transcriptomics reveals functionally specialized vascular endothelium in brain
Source: eLife. 2022 Oct 5;11:e57520. doi: 10.7554/eLife.57520 (PMC9566870; doi:10.7554/eLife.57520)
Supplement: Figure 2—source data 1. [file elife-57520-fig2-data1.xlsx]

## Sheet: Fig2E_Clusters-table_by_sample
	Figure 2-source data
	Source data for Figure 2E
	Frequency of cell types for each age
	sample	Clusters	count	freq
1	Adult	CapV	2686	0.539899
2	Adult	CapA	1001	0.201206
3	Adult	Venous	911	0.183116
4	Adult	Arterial	202	0.040603
5	Adult	REV	175	0.0351759
	Adult	Total	4975
6	Aged	CapV	2921	0.50659
7	Aged	CapA	1386	0.240375
8	Aged	Venous	1086	0.188345
9	Aged	Arterial	180	0.0312175
10	Aged	REV	193	0.0334721
	Aged	Total	5766
		All	10741
