# Supplementary material for: Single-cell transcriptomics reveals functionally specialized vascular endothelium in brain
Source: eLife. 2022 Oct 5;11:e57520. doi: 10.7554/eLife.57520 (PMC9566870; doi:10.7554/eLife.57520)
Supplement: Figure 4—source data 1. [file elife-57520-fig4-data1.xlsx]

## Sheet: Fig4H_Clusters-table_by_sample
	Figure 4-source data
	Source data for Figure 4H
	Frequency of cell types for each age
	sample	Clusters	count	freq
1	1_Juvenile	Lyve1+	497	0.791401
2	1_Juvenile	MHCII+	131	0.208599
	1_Juvenile	Total	628
3	2_Adult	Lyve1+	425	0.771325
4	2_Adult	MHCII+	126	0.228675
	2_Adult	Total	551
5	3_Aged	Lyve1+	335	0.613553
6	3_Aged	MHCII+	211	0.386447
	3_Aged	Total	546
		All	1725
