# Supplementary material for: Single-cell transcriptomics reveals functionally specialized vascular endothelium in brain
Source: eLife. 2022 Oct 5;11:e57520. doi: 10.7554/eLife.57520 (PMC9566870; doi:10.7554/eLife.57520)
Supplement: Figure 5—figure supplement 2—source data 1. [file elife-57520-fig5-figsupp2-data1.xlsx]

## Sheet: Fig5-S2_Clusters-table_by_sampl
	Figure 5-figure supplement 2-source data
	Source data for Figure 5-figure supplement 2
	Frequency of cell types for each age
	sample	Clusters	count	freq
1	Adult	CapV	2424	0.507431
2	Adult	Arterial/CapA	982	0.205568
3	Adult	Inflammatory	62	0.0129789
4	Adult	Venous	910	0.190496
5	Adult	REV	399	0.0835252
	Adult	Total	4777
6	EAE	CapV	2295	0.326319
7	EAE	Arterial/CapA	1336	0.189962
8	EAE	Inflammatory	2048	0.291199
9	EAE	Venous	763	0.108489
10	EAE	REV	591	0.0840324
	EAE	Total	7033
		All	11810
