# Supplementary material for: Single-cell transcriptomics reveals functionally specialized vascular endothelium in brain
Source: eLife. 2022 Oct 5;11:e57520. doi: 10.7554/eLife.57520 (PMC9566870; doi:10.7554/eLife.57520)
Supplement: Figure 5—source data 1. [file elife-57520-fig5-data1.xlsx]

## Sheet: WT
Quantify ICAM1 area in FoV
128745
	Cx1	Area (µm2)	Min (RS2)	Max (RS2)	Mean (RS2)	Sum (RS2)	Standard Deviation (RS2)	Perimeter (µm)	Min (ignoring zero values) (RS2)	Max (ignoring zero values) (RS2)	Mean (ignoring zero values) (RS2)	Standard Deviation (ignoring zero values) (RS2)	Skeletal Length (µm)	Skeletal Diameter (µm)			Area (µm2)	Min (RS2)	Max (RS2)	Mean (RS2)	Sum (RS2)	Standard Deviation (RS2)	Perimeter (µm)	Min (ignoring zero values) (RS2)	Max (ignoring zero values) (RS2)	Mean (ignoring zero values) (RS2)	Standard Deviation (ignoring zero values) (RS2)	Skeletal Length (µm)	Skeletal Diameter (µm)
	Sum	5016.34	315	1206	507.49	349478	185.91	4291.14	315	1206	507.49	185.91	1597.25	83.29		Mean	111.47	7	26.8	11.28	7766.18	4.13	95.36	7	26.8	11.28	4.13	35.49	1.85
	Cx2	Area (µm2)	Min (RS2)	Max (RS2)	Mean (RS2)	Sum (RS2)	Standard Deviation (RS2)	Perimeter (µm)	Min (ignoring zero values) (RS2)	Max (ignoring zero values) (RS2)	Mean (ignoring zero values) (RS2)	Standard Deviation (ignoring zero values) (RS2)	Skeletal Length (µm)	Skeletal Diameter (µm)			Area (µm2)	Min (RS2)	Max (RS2)	Mean (RS2)	Sum (RS2)	Standard Deviation (RS2)	Perimeter (µm)	Min (ignoring zero values) (RS2)	Max (ignoring zero values) (RS2)	Mean (ignoring zero values) (RS2)	Standard Deviation (ignoring zero values) (RS2)	Skeletal Length (µm)	Skeletal Diameter (µm)
	Sum	8511.64	259	1232	470.27	895694	205.23	5008.43	259	1232	470.27	205.23	1691.14	66.5		Mean	230.04	7	33.3	12.71	24208	5.55	135.36	7	33.3	12.71	5.55	45.71	1.8
	Cx3	Area (µm2)	Min (RS2)	Max (RS2)	Mean (RS2)	Sum (RS2)	Standard Deviation (RS2)	Perimeter (µm)	Min (ignoring zero values) (RS2)	Max (ignoring zero values) (RS2)	Mean (ignoring zero values) (RS2)	Standard Deviation (ignoring zero values) (RS2)	Skeletal Length (µm)	Skeletal Diameter (µm)			Area (µm2)	Min (RS2)	Max (RS2)	Mean (RS2)	Sum (RS2)	Standard Deviation (RS2)	Perimeter (µm)	Min (ignoring zero values) (RS2)	Max (ignoring zero values) (RS2)	Mean (ignoring zero values) (RS2)	Standard Deviation (ignoring zero values) (RS2)	Skeletal Length (µm)	Skeletal Diameter (µm)
	Sum	9968.57	450	1992	749.42	617698	316.7	8603.25	450	1992	749.42	316.7	2719.05	150.78		Mean	132.91	6	26.56	9.99	8235.97	4.22	114.71	6	26.56	9.99	4.22	36.25	2.01
	Cx4	Area (µm2)	Min (RS2)	Max (RS2)	Mean (RS2)	Sum (RS2)	Standard Deviation (RS2)	Perimeter (µm)	Min (ignoring zero values) (RS2)	Max (ignoring zero values) (RS2)	Mean (ignoring zero values) (RS2)	Standard Deviation (ignoring zero values) (RS2)	Skeletal Length (µm)	Skeletal Diameter (µm)			Area (µm2)	Min (RS2)	Max (RS2)	Mean (RS2)	Sum (RS2)	Standard Deviation (RS2)	Perimeter (µm)	Min (ignoring zero values) (RS2)	Max (ignoring zero values) (RS2)	Mean (ignoring zero values) (RS2)	Standard Deviation (ignoring zero values) (RS2)	Skeletal Length (µm)	Skeletal Diameter (µm)
	Sum	7155.19	168	1018	305.76	471919	152.08	5632.33	168	1018	305.76	152.08	1863.57	58.05		Mean	255.54	6	36.36	10.92	16854.2	5.43	201.15	6	36.36	10.92	5.43	66.56	2.07
	Cx5	Area (µm2)	Min (RS2)	Max (RS2)	Mean (RS2)	Sum (RS2)	Standard Deviation (RS2)	Perimeter (µm)	Min (ignoring zero values) (RS2)	Max (ignoring zero values) (RS2)	Mean (ignoring zero values) (RS2)	Standard Deviation (ignoring zero values) (RS2)	Skeletal Length (µm)	Skeletal Diameter (µm)			Area (µm2)	Min (RS2)	Max (RS2)	Mean (RS2)	Sum (RS2)	Standard Deviation (RS2)	Perimeter (µm)	Min (ignoring zero values) (RS2)	Max (ignoring zero values) (RS2)	Mean (ignoring zero values) (RS2)	Standard Deviation (ignoring zero values) (RS2)	Skeletal Length (µm)	Skeletal Diameter (µm)
	Sum	5123.36	186	831	305.89	328164	127.52	4520.82	186	831	305.89	127.52	1653.88	57.84		Mean	165.27	6	26.81	9.87	10585.9	4.11	145.83	6	26.81	9.87	4.11	53.35	1.87
	Cx6	Area (µm2)	Min (RS2)	Max (RS2)	Mean (RS2)	Sum (RS2)	Standard Deviation (RS2)	Perimeter (µm)	Min (ignoring zero values) (RS2)	Max (ignoring zero values) (RS2)	Mean (ignoring zero values) (RS2)	Standard Deviation (ignoring zero values) (RS2)	Skeletal Length (µm)	Skeletal Diameter (µm)			Area (µm2)	Min (RS2)	Max (RS2)	Mean (RS2)	Sum (RS2)	Standard Deviation (RS2)	Perimeter (µm)	Min (ignoring zero values) (RS2)	Max (ignoring zero values) (RS2)	Mean (ignoring zero values) (RS2)	Standard Deviation (ignoring zero values) (RS2)	Skeletal Length (µm)	Skeletal Diameter (µm)
	Sum	6871.01	154	768	259.54	511927	110.86	5160.63	154	768	259.54	110.86	1711.24	41.77		Mean	312.32	7	34.91	11.8	23269.4	5.04	234.57	7	34.91	11.8	5.04	77.78	1.9
	Cx7	Area (µm2)	Min (RS2)	Max (RS2)	Mean (RS2)	Sum (RS2)	Standard Deviation (RS2)	Perimeter (µm)	Min (ignoring zero values) (RS2)	Max (ignoring zero values) (RS2)	Mean (ignoring zero values) (RS2)	Standard Deviation (ignoring zero values) (RS2)	Skeletal Length (µm)	Skeletal Diameter (µm)			Area (µm2)	Min (RS2)	Max (RS2)	Mean (RS2)	Sum (RS2)	Standard Deviation (RS2)	Perimeter (µm)	Min (ignoring zero values) (RS2)	Max (ignoring zero values) (RS2)	Mean (ignoring zero values) (RS2)	Standard Deviation (ignoring zero values) (RS2)	Skeletal Length (µm)	Skeletal Diameter (µm)
	Sum	2998.29	162	916	288.3	227879	142.22	2707.77	162	916	288.3	142.22	1032.91	49.76		Mean	111.05	6	33.93	10.68	8439.96	5.27	100.29	6	33.93	10.68	5.27	38.26	1.84
	Cx8	Area (µm2)	Min (RS2)	Max (RS2)	Mean (RS2)	Sum (RS2)	Standard Deviation (RS2)	Perimeter (µm)	Min (ignoring zero values) (RS2)	Max (ignoring zero values) (RS2)	Mean (ignoring zero values) (RS2)	Standard Deviation (ignoring zero values) (RS2)	Skeletal Length (µm)	Skeletal Diameter (µm)			Area (µm2)	Min (RS2)	Max (RS2)	Mean (RS2)	Sum (RS2)	Standard Deviation (RS2)	Perimeter (µm)	Min (ignoring zero values) (RS2)	Max (ignoring zero values) (RS2)	Mean (ignoring zero values) (RS2)	Standard Deviation (ignoring zero values) (RS2)	Skeletal Length (µm)	Skeletal Diameter (µm)
	Sum	8188.69	276	1807	520.6	617478	285.09	6640.51	276	1807	520.6	285.09	2277.95	92.91		Mean	178.01	6	39.28	11.32	13423.4	6.2	144.36	6	39.28	11.32	6.2	49.52	2.02
	Cx9	Area (µm2)	Min (RS2)	Max (RS2)	Mean (RS2)	Sum (RS2)	Standard Deviation (RS2)	Perimeter (µm)	Min (ignoring zero values) (RS2)	Max (ignoring zero values) (RS2)	Mean (ignoring zero values) (RS2)	Standard Deviation (ignoring zero values) (RS2)	Skeletal Length (µm)	Skeletal Diameter (µm)			Area (µm2)	Min (RS2)	Max (RS2)	Mean (RS2)	Sum (RS2)	Standard Deviation (RS2)	Perimeter (µm)	Min (ignoring zero values) (RS2)	Max (ignoring zero values) (RS2)	Mean (ignoring zero values) (RS2)	Standard Deviation (ignoring zero values) (RS2)	Skeletal Length (µm)	Skeletal Diameter (µm)
	Sum	3183.72	156	682	273.49	218641	111.51	2869.88	156	682	273.49	111.51	1154.66	47.3		Mean	122.45	6	26.23	10.52	8409.27	4.29	110.38	6	26.23	10.52	4.29	44.41	1.82
	Cx10	Area (µm2)	Min (RS2)	Max (RS2)	Mean (RS2)	Sum (RS2)	Standard Deviation (RS2)	Perimeter (µm)	Min (ignoring zero values) (RS2)	Max (ignoring zero values) (RS2)	Mean (ignoring zero values) (RS2)	Standard Deviation (ignoring zero values) (RS2)	Skeletal Length (µm)	Skeletal Diameter (µm)			Area (µm2)	Min (RS2)	Max (RS2)	Mean (RS2)	Sum (RS2)	Standard Deviation (RS2)	Perimeter (µm)	Min (ignoring zero values) (RS2)	Max (ignoring zero values) (RS2)	Mean (ignoring zero values) (RS2)	Standard Deviation (ignoring zero values) (RS2)	Skeletal Length (µm)	Skeletal Diameter (µm)
	Sum	5956.25	252	1290	459	457611	212.2	4815.33	252	1290	459	212.2	1697.73	82.76		Mean	141.82	6	30.71	10.93	10895.5	5.05	114.65	6	30.71	10.93	5.05	40.42	1.97
128746
	Cx1	Area (µm2)	Min (RS2)	Max (RS2)	Mean (RS2)	Sum (RS2)	Standard Deviation (RS2)	Perimeter (µm)	Min (ignoring zero values) (RS2)	Max (ignoring zero values) (RS2)	Mean (ignoring zero values) (RS2)	Standard Deviation (ignoring zero values) (RS2)	Skeletal Length (µm)	Skeletal Diameter (µm)			Area (µm2)	Min (RS2)	Max (RS2)	Mean (RS2)	Sum (RS2)	Standard Deviation (RS2)	Perimeter (µm)	Min (ignoring zero values) (RS2)	Max (ignoring zero values) (RS2)	Mean (ignoring zero values) (RS2)	Standard Deviation (ignoring zero values) (RS2)	Skeletal Length (µm)	Skeletal Diameter (µm)
	Sum	3231.46	216	623	294.84	154011	87.74	3183.33	216	623	294.84	87.74	1067.21	69.7		Mean	89.76	6	17.31	8.19	4278.08	2.44	88.43	6	17.31	8.19	2.44	29.64	1.94
	Cx2	Area (µm2)	Min (RS2)	Max (RS2)	Mean (RS2)	Sum (RS2)	Standard Deviation (RS2)	Perimeter (µm)	Min (ignoring zero values) (RS2)	Max (ignoring zero values) (RS2)	Mean (ignoring zero values) (RS2)	Standard Deviation (ignoring zero values) (RS2)	Skeletal Length (µm)	Skeletal Diameter (µm)			Area (µm2)	Min (RS2)	Max (RS2)	Mean (RS2)	Sum (RS2)	Standard Deviation (RS2)	Perimeter (µm)	Min (ignoring zero values) (RS2)	Max (ignoring zero values) (RS2)	Mean (ignoring zero values) (RS2)	Standard Deviation (ignoring zero values) (RS2)	Skeletal Length (µm)	Skeletal Diameter (µm)
	Sum	4328.2	150	491	216.05	219563	68.05	3416.27	150	491	216.05	68.05	1112.53	54.49		Mean	173.13	6	19.64	8.64	8782.52	2.72	136.65	6	19.64	8.64	2.72	44.5	2.18
	Cx3	Area (µm2)	Min (RS2)	Max (RS2)	Mean (RS2)	Sum (RS2)	Standard Deviation (RS2)	Perimeter (µm)	Min (ignoring zero values) (RS2)	Max (ignoring zero values) (RS2)	Mean (ignoring zero values) (RS2)	Standard Deviation (ignoring zero values) (RS2)	Skeletal Length (µm)	Skeletal Diameter (µm)			Area (µm2)	Min (RS2)	Max (RS2)	Mean (RS2)	Sum (RS2)	Standard Deviation (RS2)	Perimeter (µm)	Min (ignoring zero values) (RS2)	Max (ignoring zero values) (RS2)	Mean (ignoring zero values) (RS2)	Standard Deviation (ignoring zero values) (RS2)	Skeletal Length (µm)	Skeletal Diameter (µm)
	Sum	10251.2	294	896	438.79	952627	135.87	5533.96	294	896	438.79	135.87	1613.72	78.07		Mean	244.08	7	21.33	10.45	22681.6	3.24	131.76	7	21.33	10.45	3.24	38.42	1.86
	Cx4	Area (µm2)	Min (RS2)	Max (RS2)	Mean (RS2)	Sum (RS2)	Standard Deviation (RS2)	Perimeter (µm)	Min (ignoring zero values) (RS2)	Max (ignoring zero values) (RS2)	Mean (ignoring zero values) (RS2)	Standard Deviation (ignoring zero values) (RS2)	Skeletal Length (µm)	Skeletal Diameter (µm)			Area (µm2)	Min (RS2)	Max (RS2)	Mean (RS2)	Sum (RS2)	Standard Deviation (RS2)	Perimeter (µm)	Min (ignoring zero values) (RS2)	Max (ignoring zero values) (RS2)	Mean (ignoring zero values) (RS2)	Standard Deviation (ignoring zero values) (RS2)	Skeletal Length (µm)	Skeletal Diameter (µm)
	Sum	6198.9	102	438	146.03	351697	48.7	3761.95	102	438	146.03	48.7	1121.25	36.89		Mean	364.64	6	25.76	8.59	20688.1	2.86	221.29	6	25.76	8.59	2.86	65.96	2.17
	Cx5	Area (µm2)	Min (RS2)	Max (RS2)	Mean (RS2)	Sum (RS2)	Standard Deviation (RS2)	Perimeter (µm)	Min (ignoring zero values) (RS2)	Max (ignoring zero values) (RS2)	Mean (ignoring zero values) (RS2)	Standard Deviation (ignoring zero values) (RS2)	Skeletal Length (µm)	Skeletal Diameter (µm)			Area (µm2)	Min (RS2)	Max (RS2)	Mean (RS2)	Sum (RS2)	Standard Deviation (RS2)	Perimeter (µm)	Min (ignoring zero values) (RS2)	Max (ignoring zero values) (RS2)	Mean (ignoring zero values) (RS2)	Standard Deviation (ignoring zero values) (RS2)	Skeletal Length (µm)	Skeletal Diameter (µm)
	Sum	11909.4	150	668	248.96	1301166	99.44	4673.54	150	668	248.96	99.44	1638.17	53.21		Mean	476.38	6	26.72	9.96	52046.6	3.98	186.94	6	26.72	9.96	3.98	65.53	2.13
	Cx6	Area (µm2)	Min (RS2)	Max (RS2)	Mean (RS2)	Sum (RS2)	Standard Deviation (RS2)	Perimeter (µm)	Min (ignoring zero values) (RS2)	Max (ignoring zero values) (RS2)	Mean (ignoring zero values) (RS2)	Standard Deviation (ignoring zero values) (RS2)	Skeletal Length (µm)	Skeletal Diameter (µm)			Area (µm2)	Min (RS2)	Max (RS2)	Mean (RS2)	Sum (RS2)	Standard Deviation (RS2)	Perimeter (µm)	Min (ignoring zero values) (RS2)	Max (ignoring zero values) (RS2)	Mean (ignoring zero values) (RS2)	Standard Deviation (ignoring zero values) (RS2)	Skeletal Length (µm)	Skeletal Diameter (µm)
	Sum	10458.2	126	414	185.31	650390	59.36	3895.28	126	414	185.31	59.36	1483.52	43.55		Mean	498.01	6	19.71	8.82	30971	2.83	185.49	6	19.71	8.82	2.83	70.64	2.07
	Cx7	Area (µm2)	Min (RS2)	Max (RS2)	Mean (RS2)	Sum (RS2)	Standard Deviation (RS2)	Perimeter (µm)	Min (ignoring zero values) (RS2)	Max (ignoring zero values) (RS2)	Mean (ignoring zero values) (RS2)	Standard Deviation (ignoring zero values) (RS2)	Skeletal Length (µm)	Skeletal Diameter (µm)			Area (µm2)	Min (RS2)	Max (RS2)	Mean (RS2)	Sum (RS2)	Standard Deviation (RS2)	Perimeter (µm)	Min (ignoring zero values) (RS2)	Max (ignoring zero values) (RS2)	Mean (ignoring zero values) (RS2)	Standard Deviation (ignoring zero values) (RS2)	Skeletal Length (µm)	Skeletal Diameter (µm)
	Sum	6454.65	264	698	345.13	326617	87.66	5369.22	264	698	345.13	87.66	1786.54	85.44		Mean	146.7	6	15.86	7.84	7423.11	1.99	122.03	6	15.86	7.84	1.99	40.6	1.94
	Cx8	Area (µm2)	Min (RS2)	Max (RS2)	Mean (RS2)	Sum (RS2)	Standard Deviation (RS2)	Perimeter (µm)	Min (ignoring zero values) (RS2)	Max (ignoring zero values) (RS2)	Mean (ignoring zero values) (RS2)	Standard Deviation (ignoring zero values) (RS2)	Skeletal Length (µm)	Skeletal Diameter (µm)			Area (µm2)	Min (RS2)	Max (RS2)	Mean (RS2)	Sum (RS2)	Standard Deviation (RS2)	Perimeter (µm)	Min (ignoring zero values) (RS2)	Max (ignoring zero values) (RS2)	Mean (ignoring zero values) (RS2)	Standard Deviation (ignoring zero values) (RS2)	Skeletal Length (µm)	Skeletal Diameter (µm)
	Sum	4105.72	240	703	349.96	220796	102.93	3611.82	240	703	349.96	102.93	1361.49	75.27		Mean	102.64	6	17.57	8.75	5519.9	2.57	90.3	6	17.57	8.75	2.57	34.04	1.88
	Cx9	Area (µm2)	Min (RS2)	Max (RS2)	Mean (RS2)	Sum (RS2)	Standard Deviation (RS2)	Perimeter (µm)	Min (ignoring zero values) (RS2)	Max (ignoring zero values) (RS2)	Mean (ignoring zero values) (RS2)	Standard Deviation (ignoring zero values) (RS2)	Skeletal Length (µm)	Skeletal Diameter (µm)			Area (µm2)	Min (RS2)	Max (RS2)	Mean (RS2)	Sum (RS2)	Standard Deviation (RS2)	Perimeter (µm)	Min (ignoring zero values) (RS2)	Max (ignoring zero values) (RS2)	Mean (ignoring zero values) (RS2)	Standard Deviation (ignoring zero values) (RS2)	Skeletal Length (µm)	Skeletal Diameter (µm)
	Sum	6907.03	258	880	367.17	360637	118.63	5413.63	258	880	367.17	118.63	1820.43	91.96		Mean	160.63	6	20.47	8.54	8386.91	2.76	125.9	6	20.47	8.54	2.76	42.34	2.14
	Cx10	Area (µm2)	Min (RS2)	Max (RS2)	Mean (RS2)	Sum (RS2)	Standard Deviation (RS2)	Perimeter (µm)	Min (ignoring zero values) (RS2)	Max (ignoring zero values) (RS2)	Mean (ignoring zero values) (RS2)	Standard Deviation (ignoring zero values) (RS2)	Skeletal Length (µm)	Skeletal Diameter (µm)			Area (µm2)	Min (RS2)	Max (RS2)	Mean (RS2)	Sum (RS2)	Standard Deviation (RS2)	Perimeter (µm)	Min (ignoring zero values) (RS2)	Max (ignoring zero values) (RS2)	Mean (ignoring zero values) (RS2)	Standard Deviation (ignoring zero values) (RS2)	Skeletal Length (µm)	Skeletal Diameter (µm)
	Sum	10774.9	426	1428	608.47	630718	199.35	8227.83	426	1428	608.47	199.35	2776.67	143.35		Mean	151.76	6	20.11	8.57	8883.35	2.81	115.88	6	20.11	8.57	2.81	39.11	2.02

## Sheet: WT_sum
Quantify ICAM1 area in FoV
		SUM						MEAN
128745		Area (µm2)	Perimeter (µm)	Mean (ignoring zero values) (RS2)	Skeletal Length (µm)	Skeletal Diameter (µm)		Mean (ignoring zero values) (RS2)					SUM					MEAN
	Cx1	5016.34	4291.14	507.49	1597.25	83.29		11.28					Area (µm2)	Perimeter (µm)	Mean (ignoring zero values) (RS2)	Skeletal Length (µm)	Skeletal Diameter (µm)	Mean (ignoring zero values) (RS2)
	Cx2	8511.64	5008.43	470.27	1691.14	66.5		12.71				128745	6297.31	5025.01	413.976	1739.94	73.096	11.002
	Cx3	9968.57	8603.25	749.42	2719.05	150.78		9.99				128746	7461.97	4708.68	320.071	1578.15	73.193	8.835
	Cx4	7155.19	5632.33	305.76	1863.57	58.05		10.92
	Cx5	5123.36	4520.82	305.89	1653.88	57.84		9.87
	Cx6	6871.01	5160.63	259.54	1711.24	41.77		11.8
	Cx7	2998.29	2707.77	288.3	1032.91	49.76		10.68
	Cx8	8188.69	6640.51	520.6	2277.95	92.91		11.32
	Cx9	3183.72	2869.88	273.49	1154.66	47.3		10.52
	Cx10	5956.25	4815.33	459	1697.73	82.76		10.93
	AVG	Area (µm2)	Perimeter (µm)	Mean (ignoring zero values) (RS2)	Skeletal Length (µm)	Skeletal Diameter (µm)		Mean (ignoring zero values) (RS2)
	CX	6297.31	5025.01	413.976	1739.94	73.096		11.002
128746		Area (µm2)	Perimeter (µm)	Mean (ignoring zero values) (RS2)	Skeletal Length (µm)	Skeletal Diameter (µm)		Mean (ignoring zero values) (RS2)
	Cx1	3231.46	3183.33	294.84	1067.21	69.7		8.19
	Cx2	4328.2	3416.27	216.05	1112.53	54.49		8.64
	Cx3	10251.2	5533.96	438.79	1613.72	78.07		10.45
	Cx4	6198.9	3761.95	146.03	1121.25	36.89		8.59
	Cx5	11909.4	4673.54	248.96	1638.17	53.21		9.96
	Cx6	10458.2	3895.28	185.31	1483.52	43.55		8.82
	Cx7	6454.65	5369.22	345.13	1786.54	85.44		7.84
	Cx8	4105.72	3611.82	349.96	1361.49	75.27		8.75
	Cx9	6907.03	5413.63	367.17	1820.43	91.96		8.54
	Cx10	10774.9	8227.83	608.47	2776.67	143.35		8.57
	AVG	Area (µm2)	Perimeter (µm)	Mean (ignoring zero values) (RS2)	Skeletal Length (µm)	Skeletal Diameter (µm)		Mean (ignoring zero values) (RS2)
	CX	7461.97	4708.68	320.071	1578.15	73.193		8.835

## Sheet: EO
Quantify ICAM1 area in FoV
411_1L
	Cx1	Area (µm2)	Min (RS2)	Max (RS2)	Mean (RS2)	Sum (RS2)	Standard Deviation (RS2)	Perimeter (µm)	Min (ignoring zero values) (RS2)	Max (ignoring zero values) (RS2)	Mean (ignoring zero values) (RS2)	Standard Deviation (ignoring zero values) (RS2)	Skeletal Length (µm)	Skeletal Diameter (µm)			Area (µm2)	Min (RS2)	Max (RS2)	Mean (RS2)	Sum (RS2)	Standard Deviation (RS2)	Perimeter (µm)	Min (ignoring zero values) (RS2)	Max (ignoring zero values) (RS2)	Mean (ignoring zero values) (RS2)	Standard Deviation (ignoring zero values) (RS2)	Skeletal Length (µm)	Skeletal Diameter (µm)
	Sum	13387.7	272	1910	544.66	2017097	298.57	7141.93	272	1910	544.66	298.57	2057.58	74.98		Mean	393.76	8	56.18	16.02	59326.4	8.78	210.06	8	56.18	16.02	8.78	60.52	2.21
	Cx2	Area (µm2)	Min (RS2)	Max (RS2)	Mean (RS2)	Sum (RS2)	Standard Deviation (RS2)	Perimeter (µm)	Min (ignoring zero values) (RS2)	Max (ignoring zero values) (RS2)	Mean (ignoring zero values) (RS2)	Standard Deviation (ignoring zero values) (RS2)	Skeletal Length (µm)	Skeletal Diameter (µm)			Area (µm2)	Min (RS2)	Max (RS2)	Mean (RS2)	Sum (RS2)	Standard Deviation (RS2)	Perimeter (µm)	Min (ignoring zero values) (RS2)	Max (ignoring zero values) (RS2)	Mean (ignoring zero values) (RS2)	Standard Deviation (ignoring zero values) (RS2)	Skeletal Length (µm)	Skeletal Diameter (µm)
	Sum	9883.43	336	2195	724.6	1407014	375.58	5827.99	336	2195	724.6	375.58	1955.76	89.1		Mean	235.32	8	52.26	17.25	33500.3	8.94	138.76	8	52.26	17.25	8.94	46.57	2.12
	Cx3	Area (µm2)	Min (RS2)	Max (RS2)	Mean (RS2)	Sum (RS2)	Standard Deviation (RS2)	Perimeter (µm)	Min (ignoring zero values) (RS2)	Max (ignoring zero values) (RS2)	Mean (ignoring zero values) (RS2)	Standard Deviation (ignoring zero values) (RS2)	Skeletal Length (µm)	Skeletal Diameter (µm)			Area (µm2)	Min (RS2)	Max (RS2)	Mean (RS2)	Sum (RS2)	Standard Deviation (RS2)	Perimeter (µm)	Min (ignoring zero values) (RS2)	Max (ignoring zero values) (RS2)	Mean (ignoring zero values) (RS2)	Standard Deviation (ignoring zero values) (RS2)	Skeletal Length (µm)	Skeletal Diameter (µm)
	Sum	8397.9	343	1616	642.07	994199	296.33	5513.98	343	1616	642.07	296.33	1784.01	93.58		Mean	171.39	7	32.98	13.1	20289.8	6.05	112.53	7	32.98	13.1	6.05	36.41	1.91
	Cx4	Area (µm2)	Min (RS2)	Max (RS2)	Mean (RS2)	Sum (RS2)	Standard Deviation (RS2)	Perimeter (µm)	Min (ignoring zero values) (RS2)	Max (ignoring zero values) (RS2)	Mean (ignoring zero values) (RS2)	Standard Deviation (ignoring zero values) (RS2)	Skeletal Length (µm)	Skeletal Diameter (µm)			Area (µm2)	Min (RS2)	Max (RS2)	Mean (RS2)	Sum (RS2)	Standard Deviation (RS2)	Perimeter (µm)	Min (ignoring zero values) (RS2)	Max (ignoring zero values) (RS2)	Mean (ignoring zero values) (RS2)	Standard Deviation (ignoring zero values) (RS2)	Skeletal Length (µm)	Skeletal Diameter (µm)
	Sum	16790.8	408	2918	870.94	2677690	473.6	8632.35	408	2918	870.94	473.6	2777.51	110.32		Mean	329.23	8	57.22	17.08	52503.7	9.29	169.26	8	57.22	17.08	9.29	54.46	2.16
	Cx5	Area (µm2)	Min (RS2)	Max (RS2)	Mean (RS2)	Sum (RS2)	Standard Deviation (RS2)	Perimeter (µm)	Min (ignoring zero values) (RS2)	Max (ignoring zero values) (RS2)	Mean (ignoring zero values) (RS2)	Standard Deviation (ignoring zero values) (RS2)	Skeletal Length (µm)	Skeletal Diameter (µm)			Area (µm2)	Min (RS2)	Max (RS2)	Mean (RS2)	Sum (RS2)	Standard Deviation (RS2)	Perimeter (µm)	Min (ignoring zero values) (RS2)	Max (ignoring zero values) (RS2)	Mean (ignoring zero values) (RS2)	Standard Deviation (ignoring zero values) (RS2)	Skeletal Length (µm)	Skeletal Diameter (µm)
	Sum	10071.5	318	1265	480.29	591646	177.66	7578.66	318	1265	480.29	177.66	2474.18	111.08		Mean	190.03	6	23.87	9.06	11163.1	3.35	142.99	6	23.87	9.06	3.35	46.68	2.1
	Cx6	Area (µm2)	Min (RS2)	Max (RS2)	Mean (RS2)	Sum (RS2)	Standard Deviation (RS2)	Perimeter (µm)	Min (ignoring zero values) (RS2)	Max (ignoring zero values) (RS2)	Mean (ignoring zero values) (RS2)	Standard Deviation (ignoring zero values) (RS2)	Skeletal Length (µm)	Skeletal Diameter (µm)			Area (µm2)	Min (RS2)	Max (RS2)	Mean (RS2)	Sum (RS2)	Standard Deviation (RS2)	Perimeter (µm)	Min (ignoring zero values) (RS2)	Max (ignoring zero values) (RS2)	Mean (ignoring zero values) (RS2)	Standard Deviation (ignoring zero values) (RS2)	Skeletal Length (µm)	Skeletal Diameter (µm)
	Sum	8692.77	357	1714	656.37	783250	291.21	6102.33	357	1714	656.37	291.21	2155.78	107.84		Mean	170.45	7	33.61	12.87	15357.8	5.71	119.65	7	33.61	12.87	5.71	42.27	2.11
	Cx7	Area (µm2)	Min (RS2)	Max (RS2)	Mean (RS2)	Sum (RS2)	Standard Deviation (RS2)	Perimeter (µm)	Min (ignoring zero values) (RS2)	Max (ignoring zero values) (RS2)	Mean (ignoring zero values) (RS2)	Standard Deviation (ignoring zero values) (RS2)	Skeletal Length (µm)	Skeletal Diameter (µm)			Area (µm2)	Min (RS2)	Max (RS2)	Mean (RS2)	Sum (RS2)	Standard Deviation (RS2)	Perimeter (µm)	Min (ignoring zero values) (RS2)	Max (ignoring zero values) (RS2)	Mean (ignoring zero values) (RS2)	Standard Deviation (ignoring zero values) (RS2)	Skeletal Length (µm)	Skeletal Diameter (µm)
	Sum	12425.2	324	2100	683.59	2319069	366.18	6596.37	324	2100	683.59	366.18	1905.01	75.09		Mean	345.14	9	58.33	18.99	64418.6	10.17	183.23	9	58.33	18.99	10.17	52.92	2.09
	Cx8	Area (µm2)	Min (RS2)	Max (RS2)	Mean (RS2)	Sum (RS2)	Standard Deviation (RS2)	Perimeter (µm)	Min (ignoring zero values) (RS2)	Max (ignoring zero values) (RS2)	Mean (ignoring zero values) (RS2)	Standard Deviation (ignoring zero values) (RS2)	Skeletal Length (µm)	Skeletal Diameter (µm)			Area (µm2)	Min (RS2)	Max (RS2)	Mean (RS2)	Sum (RS2)	Standard Deviation (RS2)	Perimeter (µm)	Min (ignoring zero values) (RS2)	Max (ignoring zero values) (RS2)	Mean (ignoring zero values) (RS2)	Standard Deviation (ignoring zero values) (RS2)	Skeletal Length (µm)	Skeletal Diameter (µm)
	Sum	14462.9	120	982	274.87	3086057	159.98	7008.04	120	982	274.87	159.98	2053.29	33.33		Mean	964.19	8	65.47	18.32	205737	10.67	467.2	8	65.47	18.32	10.67	136.89	2.22
	Cx9	Area (µm2)	Min (RS2)	Max (RS2)	Mean (RS2)	Sum (RS2)	Standard Deviation (RS2)	Perimeter (µm)	Min (ignoring zero values) (RS2)	Max (ignoring zero values) (RS2)	Mean (ignoring zero values) (RS2)	Standard Deviation (ignoring zero values) (RS2)	Skeletal Length (µm)	Skeletal Diameter (µm)			Area (µm2)	Min (RS2)	Max (RS2)	Mean (RS2)	Sum (RS2)	Standard Deviation (RS2)	Perimeter (µm)	Min (ignoring zero values) (RS2)	Max (ignoring zero values) (RS2)	Mean (ignoring zero values) (RS2)	Standard Deviation (ignoring zero values) (RS2)	Skeletal Length (µm)	Skeletal Diameter (µm)
	Sum	10542.4	208	1214	378.36	1194874	170.95	6292.92	208	1214	378.36	170.95	1772.31	59.89		Mean	405.48	8	46.69	14.55	45956.7	6.57	242.04	8	46.69	14.55	6.57	68.17	2.3
	Cx10	Area (µm2)	Min (RS2)	Max (RS2)	Mean (RS2)	Sum (RS2)	Standard Deviation (RS2)	Perimeter (µm)	Min (ignoring zero values) (RS2)	Max (ignoring zero values) (RS2)	Mean (ignoring zero values) (RS2)	Standard Deviation (ignoring zero values) (RS2)	Skeletal Length (µm)	Skeletal Diameter (µm)			Area (µm2)	Min (RS2)	Max (RS2)	Mean (RS2)	Sum (RS2)	Standard Deviation (RS2)	Perimeter (µm)	Min (ignoring zero values) (RS2)	Max (ignoring zero values) (RS2)	Mean (ignoring zero values) (RS2)	Standard Deviation (ignoring zero values) (RS2)	Skeletal Length (µm)	Skeletal Diameter (µm)
	Sum	7505.2	216	1728	503.99	1209326	308.38	5266.26	216	1728	503.99	308.38	1739.02	57		Mean	277.97	8	64	18.67	44789.8	11.42	195.05	8	64	18.67	11.42	64.41	2.11
411_2R
	Cx1	Area (µm2)	Min (RS2)	Max (RS2)	Mean (RS2)	Sum (RS2)	Standard Deviation (RS2)	Perimeter (µm)	Min (ignoring zero values) (RS2)	Max (ignoring zero values) (RS2)	Mean (ignoring zero values) (RS2)	Standard Deviation (ignoring zero values) (RS2)	Skeletal Length (µm)	Skeletal Diameter (µm)			Area (µm2)	Min (RS2)	Max (RS2)	Mean (RS2)	Sum (RS2)	Standard Deviation (RS2)	Perimeter (µm)	Min (ignoring zero values) (RS2)	Max (ignoring zero values) (RS2)	Mean (ignoring zero values) (RS2)	Standard Deviation (ignoring zero values) (RS2)	Skeletal Length (µm)	Skeletal Diameter (µm)
	Sum	9712.99	66	573	134.11	1021938	84	4974.68	66	573	134.11	84	1202.04	27.23		Mean	883	6	52.09	12.19	92903.4	7.64	452.24	6	52.09	12.19	7.64	109.28	2.48
	Cx2	Area (µm2)	Min (RS2)	Max (RS2)	Mean (RS2)	Sum (RS2)	Standard Deviation (RS2)	Perimeter (µm)	Min (ignoring zero values) (RS2)	Max (ignoring zero values) (RS2)	Mean (ignoring zero values) (RS2)	Standard Deviation (ignoring zero values) (RS2)	Skeletal Length (µm)	Skeletal Diameter (µm)			Area (µm2)	Min (RS2)	Max (RS2)	Mean (RS2)	Sum (RS2)	Standard Deviation (RS2)	Perimeter (µm)	Min (ignoring zero values) (RS2)	Max (ignoring zero values) (RS2)	Mean (ignoring zero values) (RS2)	Standard Deviation (ignoring zero values) (RS2)	Skeletal Length (µm)	Skeletal Diameter (µm)
	Sum	15214.3	176	1131	348.79	2266522	174.98	6558.76	176	1131	348.79	174.98	1853.63	45.25		Mean	691.56	8	51.41	15.85	103024	7.95	298.13	8	51.41	15.85	7.95	84.26	2.06
	Cx3	Area (µm2)	Min (RS2)	Max (RS2)	Mean (RS2)	Sum (RS2)	Standard Deviation (RS2)	Perimeter (µm)	Min (ignoring zero values) (RS2)	Max (ignoring zero values) (RS2)	Mean (ignoring zero values) (RS2)	Standard Deviation (ignoring zero values) (RS2)	Skeletal Length (µm)	Skeletal Diameter (µm)			Area (µm2)	Min (RS2)	Max (RS2)	Mean (RS2)	Sum (RS2)	Standard Deviation (RS2)	Perimeter (µm)	Min (ignoring zero values) (RS2)	Max (ignoring zero values) (RS2)	Mean (ignoring zero values) (RS2)	Standard Deviation (ignoring zero values) (RS2)	Skeletal Length (µm)	Skeletal Diameter (µm)
	Sum	5206.77	84	681	169.49	617563	91.95	3085.08	84	681	169.49	91.95	1058.89	28.31		Mean	371.91	6	48.64	12.11	44111.6	6.57	220.36	6	48.64	12.11	6.57	75.64	2.02
	Cx4	Area (µm2)	Min (RS2)	Max (RS2)	Mean (RS2)	Sum (RS2)	Standard Deviation (RS2)	Perimeter (µm)	Min (ignoring zero values) (RS2)	Max (ignoring zero values) (RS2)	Mean (ignoring zero values) (RS2)	Standard Deviation (ignoring zero values) (RS2)	Skeletal Length (µm)	Skeletal Diameter (µm)			Area (µm2)	Min (RS2)	Max (RS2)	Mean (RS2)	Sum (RS2)	Standard Deviation (RS2)	Perimeter (µm)	Min (ignoring zero values) (RS2)	Max (ignoring zero values) (RS2)	Mean (ignoring zero values) (RS2)	Standard Deviation (ignoring zero values) (RS2)	Skeletal Length (µm)	Skeletal Diameter (µm)
	Sum	9325.75	114	826	250.24	1357793	135.54	4991.84	114	826	250.24	135.54	1495.61	38.95		Mean	490.83	6	43.47	13.17	71462.8	7.13	262.73	6	43.47	13.17	7.13	78.72	2.05
	Cx5	Area (µm2)	Min (RS2)	Max (RS2)	Mean (RS2)	Sum (RS2)	Standard Deviation (RS2)	Perimeter (µm)	Min (ignoring zero values) (RS2)	Max (ignoring zero values) (RS2)	Mean (ignoring zero values) (RS2)	Standard Deviation (ignoring zero values) (RS2)	Skeletal Length (µm)	Skeletal Diameter (µm)			Area (µm2)	Min (RS2)	Max (RS2)	Mean (RS2)	Sum (RS2)	Standard Deviation (RS2)	Perimeter (µm)	Min (ignoring zero values) (RS2)	Max (ignoring zero values) (RS2)	Mean (ignoring zero values) (RS2)	Standard Deviation (ignoring zero values) (RS2)	Skeletal Length (µm)	Skeletal Diameter (µm)
	Sum	5903	154	699	266.78	799613	110.4	3660.78	154	699	266.78	110.4	1171.6	42.12		Mean	268.32	7	31.77	12.13	36346.1	5.02	166.4	7	31.77	12.13	5.02	53.25	1.91
	Cx6	Area (µm2)	Min (RS2)	Max (RS2)	Mean (RS2)	Sum (RS2)	Standard Deviation (RS2)	Perimeter (µm)	Min (ignoring zero values) (RS2)	Max (ignoring zero values) (RS2)	Mean (ignoring zero values) (RS2)	Standard Deviation (ignoring zero values) (RS2)	Skeletal Length (µm)	Skeletal Diameter (µm)			Area (µm2)	Min (RS2)	Max (RS2)	Mean (RS2)	Sum (RS2)	Standard Deviation (RS2)	Perimeter (µm)	Min (ignoring zero values) (RS2)	Max (ignoring zero values) (RS2)	Mean (ignoring zero values) (RS2)	Standard Deviation (ignoring zero values) (RS2)	Skeletal Length (µm)	Skeletal Diameter (µm)
	Sum	10337.4	84	857	184.29	1371395	120.75	5023.97	84	857	184.29	120.75	1395.14	29.13		Mean	861.45	7	71.42	15.36	114283	10.06	418.66	7	71.42	15.36	10.06	116.26	2.43
	Cx7	Area (µm2)	Min (RS2)	Max (RS2)	Mean (RS2)	Sum (RS2)	Standard Deviation (RS2)	Perimeter (µm)	Min (ignoring zero values) (RS2)	Max (ignoring zero values) (RS2)	Mean (ignoring zero values) (RS2)	Standard Deviation (ignoring zero values) (RS2)	Skeletal Length (µm)	Skeletal Diameter (µm)			Area (µm2)	Min (RS2)	Max (RS2)	Mean (RS2)	Sum (RS2)	Standard Deviation (RS2)	Perimeter (µm)	Min (ignoring zero values) (RS2)	Max (ignoring zero values) (RS2)	Mean (ignoring zero values) (RS2)	Standard Deviation (ignoring zero values) (RS2)	Skeletal Length (µm)	Skeletal Diameter (µm)
	Sum	8577.3	176	1009	349.29	1174344	157.93	4914.04	176	1009	349.29	157.93	1598.16	45.95		Mean	389.88	8	45.86	15.88	53379.3	7.18	223.37	8	45.86	15.88	7.18	72.64	2.09
	Cx8	Area (µm2)	Min (RS2)	Max (RS2)	Mean (RS2)	Sum (RS2)	Standard Deviation (RS2)	Perimeter (µm)	Min (ignoring zero values) (RS2)	Max (ignoring zero values) (RS2)	Mean (ignoring zero values) (RS2)	Standard Deviation (ignoring zero values) (RS2)	Skeletal Length (µm)	Skeletal Diameter (µm)			Area (µm2)	Min (RS2)	Max (RS2)	Mean (RS2)	Sum (RS2)	Standard Deviation (RS2)	Perimeter (µm)	Min (ignoring zero values) (RS2)	Max (ignoring zero values) (RS2)	Mean (ignoring zero values) (RS2)	Standard Deviation (ignoring zero values) (RS2)	Skeletal Length (µm)	Skeletal Diameter (µm)
	Sum	10338.7	128	1175	289.14	1773076	176.87	5201.1	128	1175	289.14	176.87	1374.82	35.67		Mean	646.17	8	73.44	18.07	110817	11.05	325.07	8	73.44	18.07	11.05	85.93	2.23
	Cx9	Area (µm2)	Min (RS2)	Max (RS2)	Mean (RS2)	Sum (RS2)	Standard Deviation (RS2)	Perimeter (µm)	Min (ignoring zero values) (RS2)	Max (ignoring zero values) (RS2)	Mean (ignoring zero values) (RS2)	Standard Deviation (ignoring zero values) (RS2)	Skeletal Length (µm)	Skeletal Diameter (µm)			Area (µm2)	Min (RS2)	Max (RS2)	Mean (RS2)	Sum (RS2)	Standard Deviation (RS2)	Perimeter (µm)	Min (ignoring zero values) (RS2)	Max (ignoring zero values) (RS2)	Mean (ignoring zero values) (RS2)	Standard Deviation (ignoring zero values) (RS2)	Skeletal Length (µm)	Skeletal Diameter (µm)
	Sum	8832.88	189	1821	535.66	2284330	336.48	4441.07	189	1821	535.66	336.48	1314.72	45.41		Mean	420.61	9	86.71	25.51	108778	16.02	211.48	9	86.71	25.51	16.02	62.61	2.16
	Cx10	Area (µm2)	Min (RS2)	Max (RS2)	Mean (RS2)	Sum (RS2)	Standard Deviation (RS2)	Perimeter (µm)	Min (ignoring zero values) (RS2)	Max (ignoring zero values) (RS2)	Mean (ignoring zero values) (RS2)	Standard Deviation (ignoring zero values) (RS2)	Skeletal Length (µm)	Skeletal Diameter (µm)			Area (µm2)	Min (RS2)	Max (RS2)	Mean (RS2)	Sum (RS2)	Standard Deviation (RS2)	Perimeter (µm)	Min (ignoring zero values) (RS2)	Max (ignoring zero values) (RS2)	Mean (ignoring zero values) (RS2)	Standard Deviation (ignoring zero values) (RS2)	Skeletal Length (µm)	Skeletal Diameter (µm)
	Sum	8587.47	224	1866	481.49	894067	307.9	6170.22	224	1866	481.49	307.9	1865.53	73.75		Mean	268.36	7	58.31	15.05	27939.6	9.62	192.82	7	58.31	15.05	9.62	58.3	2.3
425
	Cx1	Area (µm2)	Min (RS2)	Max (RS2)	Mean (RS2)	Sum (RS2)	Standard Deviation (RS2)	Perimeter (µm)	Min (ignoring zero values) (RS2)	Max (ignoring zero values) (RS2)	Mean (ignoring zero values) (RS2)	Standard Deviation (ignoring zero values) (RS2)	Skeletal Length (µm)	Skeletal Diameter (µm)			Area (µm2)	Min (RS2)	Max (RS2)	Mean (RS2)	Sum (RS2)	Standard Deviation (RS2)	Perimeter (µm)	Min (ignoring zero values) (RS2)	Max (ignoring zero values) (RS2)	Mean (ignoring zero values) (RS2)	Standard Deviation (ignoring zero values) (RS2)	Skeletal Length (µm)	Skeletal Diameter (µm)
	Sum	13552.5	272	2351	663.48	1774029	409.31	8471.3	272	2351	663.48	409.31	2555.99	75.39		Mean	398.6	8	69.15	19.51	52177.3	12.04	249.16	8	69.15	19.51	12.04	75.18	2.22
	Cx2	Area (µm2)	Min (RS2)	Max (RS2)	Mean (RS2)	Sum (RS2)	Standard Deviation (RS2)	Perimeter (µm)	Min (ignoring zero values) (RS2)	Max (ignoring zero values) (RS2)	Mean (ignoring zero values) (RS2)	Standard Deviation (ignoring zero values) (RS2)	Skeletal Length (µm)	Skeletal Diameter (µm)			Area (µm2)	Min (RS2)	Max (RS2)	Mean (RS2)	Sum (RS2)	Standard Deviation (RS2)	Perimeter (µm)	Min (ignoring zero values) (RS2)	Max (ignoring zero values) (RS2)	Mean (ignoring zero values) (RS2)	Standard Deviation (ignoring zero values) (RS2)	Skeletal Length (µm)	Skeletal Diameter (µm)
	Sum	17678.5	230	1749	515.48	3881899	270.32	7715.91	230	1749	515.48	270.32	2130.26	55.13		Mean	768.63	10	76.04	22.41	168778	11.75	335.47	10	76.04	22.41	11.75	92.62	2.4
	Cx3	Area (µm2)	Min (RS2)	Max (RS2)	Mean (RS2)	Sum (RS2)	Standard Deviation (RS2)	Perimeter (µm)	Min (ignoring zero values) (RS2)	Max (ignoring zero values) (RS2)	Mean (ignoring zero values) (RS2)	Standard Deviation (ignoring zero values) (RS2)	Skeletal Length (µm)	Skeletal Diameter (µm)			Area (µm2)	Min (RS2)	Max (RS2)	Mean (RS2)	Sum (RS2)	Standard Deviation (RS2)	Perimeter (µm)	Min (ignoring zero values) (RS2)	Max (ignoring zero values) (RS2)	Mean (ignoring zero values) (RS2)	Standard Deviation (ignoring zero values) (RS2)	Skeletal Length (µm)	Skeletal Diameter (µm)
	Sum	12820	216	1772	476.07	2027131	275.65	8175.13	216	1772	476.07	275.65	2118.9	52.91		Mean	534.17	9	73.83	19.84	84463.8	11.49	340.63	9	73.83	19.84	11.49	88.29	2.2
	Cx4	Area (µm2)	Min (RS2)	Max (RS2)	Mean (RS2)	Sum (RS2)	Standard Deviation (RS2)	Perimeter (µm)	Min (ignoring zero values) (RS2)	Max (ignoring zero values) (RS2)	Mean (ignoring zero values) (RS2)	Standard Deviation (ignoring zero values) (RS2)	Skeletal Length (µm)	Skeletal Diameter (µm)			Area (µm2)	Min (RS2)	Max (RS2)	Mean (RS2)	Sum (RS2)	Standard Deviation (RS2)	Perimeter (µm)	Min (ignoring zero values) (RS2)	Max (ignoring zero values) (RS2)	Mean (ignoring zero values) (RS2)	Standard Deviation (ignoring zero values) (RS2)	Skeletal Length (µm)	Skeletal Diameter (µm)
	Sum	16800.1	225	1454	451.58	2541938	208.53	9329.91	225	1454	451.58	208.53	2318.37	51.95		Mean	672	9	58.16	18.06	101678	8.34	373.2	9	58.16	18.06	8.34	92.73	2.08
	Cx5	Area (µm2)	Min (RS2)	Max (RS2)	Mean (RS2)	Sum (RS2)	Standard Deviation (RS2)	Perimeter (µm)	Min (ignoring zero values) (RS2)	Max (ignoring zero values) (RS2)	Mean (ignoring zero values) (RS2)	Standard Deviation (ignoring zero values) (RS2)	Skeletal Length (µm)	Skeletal Diameter (µm)			Area (µm2)	Min (RS2)	Max (RS2)	Mean (RS2)	Sum (RS2)	Standard Deviation (RS2)	Perimeter (µm)	Min (ignoring zero values) (RS2)	Max (ignoring zero values) (RS2)	Mean (ignoring zero values) (RS2)	Standard Deviation (ignoring zero values) (RS2)	Skeletal Length (µm)	Skeletal Diameter (µm)
	Sum	8621.08	340	2450	711.25	1266342	388.69	5488.47	340	2450	711.25	388.69	1840.52	72.89		Mean	253.56	10	72.06	20.92	37245.3	11.43	161.43	10	72.06	20.92	11.43	54.13	2.14
	Cx6	Area (µm2)	Min (RS2)	Max (RS2)	Mean (RS2)	Sum (RS2)	Standard Deviation (RS2)	Perimeter (µm)	Min (ignoring zero values) (RS2)	Max (ignoring zero values) (RS2)	Mean (ignoring zero values) (RS2)	Standard Deviation (ignoring zero values) (RS2)	Skeletal Length (µm)	Skeletal Diameter (µm)			Area (µm2)	Min (RS2)	Max (RS2)	Mean (RS2)	Sum (RS2)	Standard Deviation (RS2)	Perimeter (µm)	Min (ignoring zero values) (RS2)	Max (ignoring zero values) (RS2)	Mean (ignoring zero values) (RS2)	Standard Deviation (ignoring zero values) (RS2)	Skeletal Length (µm)	Skeletal Diameter (µm)
	Sum	19408.8	272	1498	492.44	2362367	213.31	11323.6	272	1498	492.44	213.31	3357.7	69.88		Mean	570.85	8	44.06	14.48	69481.4	6.27	333.05	8	44.06	14.48	6.27	98.76	2.06
	Cx7	Area (µm2)	Min (RS2)	Max (RS2)	Mean (RS2)	Sum (RS2)	Standard Deviation (RS2)	Perimeter (µm)	Min (ignoring zero values) (RS2)	Max (ignoring zero values) (RS2)	Mean (ignoring zero values) (RS2)	Standard Deviation (ignoring zero values) (RS2)	Skeletal Length (µm)	Skeletal Diameter (µm)			Area (µm2)	Min (RS2)	Max (RS2)	Mean (RS2)	Sum (RS2)	Standard Deviation (RS2)	Perimeter (µm)	Min (ignoring zero values) (RS2)	Max (ignoring zero values) (RS2)	Mean (ignoring zero values) (RS2)	Standard Deviation (ignoring zero values) (RS2)	Skeletal Length (µm)	Skeletal Diameter (µm)
	Sum	22930.4	350	2260	712.98	3876227	341.69	10635.2	350	2260	712.98	341.69	2528.47	80.37		Mean	655.15	10	64.57	20.37	110749	9.76	303.86	10	64.57	20.37	9.76	72.24	2.3
	Cx8	Area (µm2)	Min (RS2)	Max (RS2)	Mean (RS2)	Sum (RS2)	Standard Deviation (RS2)	Perimeter (µm)	Min (ignoring zero values) (RS2)	Max (ignoring zero values) (RS2)	Mean (ignoring zero values) (RS2)	Standard Deviation (ignoring zero values) (RS2)	Skeletal Length (µm)	Skeletal Diameter (µm)			Area (µm2)	Min (RS2)	Max (RS2)	Mean (RS2)	Sum (RS2)	Standard Deviation (RS2)	Perimeter (µm)	Min (ignoring zero values) (RS2)	Max (ignoring zero values) (RS2)	Mean (ignoring zero values) (RS2)	Standard Deviation (ignoring zero values) (RS2)	Skeletal Length (µm)	Skeletal Diameter (µm)
	Sum	15766.1	189	1328	415.96	3088418	213.67	7755.98	189	1328	415.96	213.67	1876.87	43.94		Mean	750.77	9	63.24	19.81	147068	10.17	369.33	9	63.24	19.81	10.17	89.37	2.09
	Cx9	Area (µm2)	Min (RS2)	Max (RS2)	Mean (RS2)	Sum (RS2)	Standard Deviation (RS2)	Perimeter (µm)	Min (ignoring zero values) (RS2)	Max (ignoring zero values) (RS2)	Mean (ignoring zero values) (RS2)	Standard Deviation (ignoring zero values) (RS2)	Skeletal Length (µm)	Skeletal Diameter (µm)			Area (µm2)	Min (RS2)	Max (RS2)	Mean (RS2)	Sum (RS2)	Standard Deviation (RS2)	Perimeter (µm)	Min (ignoring zero values) (RS2)	Max (ignoring zero values) (RS2)	Mean (ignoring zero values) (RS2)	Standard Deviation (ignoring zero values) (RS2)	Skeletal Length (µm)	Skeletal Diameter (µm)
	Sum	19806	320	2453	730.27	2943823	401.62	9381.84	320	2453	730.27	401.62	2568.48	69.27		Mean	618.94	10	76.66	22.82	91994.5	12.55	293.18	10	76.66	22.82	12.55	80.27	2.16
	Cx10	Area (µm2)	Min (RS2)	Max (RS2)	Mean (RS2)	Sum (RS2)	Standard Deviation (RS2)	Perimeter (µm)	Min (ignoring zero values) (RS2)	Max (ignoring zero values) (RS2)	Mean (ignoring zero values) (RS2)	Standard Deviation (ignoring zero values) (RS2)	Skeletal Length (µm)	Skeletal Diameter (µm)			Area (µm2)	Min (RS2)	Max (RS2)	Mean (RS2)	Sum (RS2)	Standard Deviation (RS2)	Perimeter (µm)	Min (ignoring zero values) (RS2)	Max (ignoring zero values) (RS2)	Mean (ignoring zero values) (RS2)	Standard Deviation (ignoring zero values) (RS2)	Skeletal Length (µm)	Skeletal Diameter (µm)
	Sum	8148.88	546	3338	1177.1	1495706	579.83	5835.43	546	3338	1177.1	579.83	2074.13	88.89		Mean	194.02	13	79.48	28.03	35612.1	13.81	138.94	13	79.48	28.03	13.81	49.38	2.12

## Sheet: EO_sum
Quantify ICAM1 area in FoV
		SUM
411_1L		Area (µm2)	Perimeter (µm)	Mean (ignoring zero values) (RS2)	Skeletal Length (µm)	Skeletal Diameter (µm)		Mean (ignoring zero values) (RS2)			SUM					MEAN
	Cx1	13387.7	7141.93	544.66	2057.58	74.98		16.02		AVG	Area (µm2)	Perimeter (µm)	Mean (ignoring zero values) (RS2)	Skeletal Length (µm)	Skeletal Diameter (µm)	Mean (ignoring zero values) (RS2)
	Cx2	9883.43	5827.99	724.6	1955.76	89.1		17.25		411_1L	11216	6596.08	575.974	2067.45	81.221	15.591
	Cx3	8397.9	5513.98	642.07	1784.01	93.58		13.1		411_2R	9203.65	4902.15	300.928	1433.01	41.177	15.532
	Cx4	16790.8	8632.35	870.94	2777.51	110.32		17.08		425	15553.2	8411.28	634.661	2336.97	66.062	20.625
	Cx5	10071.5	7578.66	480.29	2474.18	111.08		9.06
	Cx6	8692.77	6102.33	656.37	2155.78	107.84		12.87
	Cx7	12425.2	6596.37	683.59	1905.01	75.09		18.99
	Cx8	14462.9	7008.04	274.87	2053.29	33.33		18.32
	Cx9	10542.4	6292.92	378.36	1772.31	59.89		14.55
	Cx10	7505.2	5266.26	503.99	1739.02	57		18.67
	AVG	Area (µm2)	Perimeter (µm)	Mean (ignoring zero values) (RS2)	Skeletal Length (µm)	Skeletal Diameter (µm)		Mean (ignoring zero values) (RS2)
	CX	11216	6596.08	575.974	2067.45	81.221		15.591
411_2R		Area (µm2)	Perimeter (µm)	Mean (ignoring zero values) (RS2)	Skeletal Length (µm)	Skeletal Diameter (µm)		Mean (ignoring zero values) (RS2)
	Cx1	9712.99	4974.68	134.11	1202.04	27.23		12.19
	Cx2	15214.3	6558.76	348.79	1853.63	45.25		15.85
	Cx3	5206.77	3085.08	169.49	1058.89	28.31		12.11
	Cx4	9325.75	4991.84	250.24	1495.61	38.95		13.17
	Cx5	5903	3660.78	266.78	1171.6	42.12		12.13
	Cx6	10337.4	5023.97	184.29	1395.14	29.13		15.36
	Cx7	8577.3	4914.04	349.29	1598.16	45.95		15.88
	Cx8	10338.7	5201.1	289.14	1374.82	35.67		18.07
	Cx9	8832.88	4441.07	535.66	1314.72	45.41		25.51
	Cx10	8587.47	6170.22	481.49	1865.53	73.75		15.05
	AVG	Area (µm2)	Perimeter (µm)	Mean (ignoring zero values) (RS2)	Skeletal Length (µm)	Skeletal Diameter (µm)		Mean (ignoring zero values) (RS2)
	CX	9203.65	4902.15	300.928	1433.01	41.177		15.532
425		Area (µm2)	Perimeter (µm)	Mean (ignoring zero values) (RS2)	Skeletal Length (µm)	Skeletal Diameter (µm)		Mean (ignoring zero values) (RS2)
	Cx1	13552.5	8471.3	663.48	2555.99	75.39		19.51
	Cx2	17678.5	7715.91	515.48	2130.26	55.13		22.41
	Cx3	12820	8175.13	476.07	2118.9	52.91		19.84
	Cx4	16800.1	9329.91	451.58	2318.37	51.95		18.06
	Cx5	8621.08	5488.47	711.25	1840.52	72.89		20.92
	Cx6	19408.8	11323.6	492.44	3357.7	69.88		14.48
	Cx7	22930.4	10635.2	712.98	2528.47	80.37		20.37
	Cx8	15766.1	7755.98	415.96	1876.87	43.94		19.81
	Cx9	19806	9381.84	730.27	2568.48	69.27		22.82
	Cx10	8148.88	5835.43	1177.1	2074.13	88.89		28.03
	AVG	Area (µm2)	Perimeter (µm)	Mean (ignoring zero values) (RS2)	Skeletal Length (µm)	Skeletal Diameter (µm)		Mean (ignoring zero values) (RS2)
	CX	15553.2	8411.28	634.661	2336.97	66.062		20.625

## Sheet: LO
Quantify ICAM1 area in FoV
F1
	Cx1	Area (µm2)	Min (RS2)	Max (RS2)	Mean (RS2)	Sum (RS2)	Standard Deviation (RS2)	Perimeter (µm)	Min (ignoring zero values) (RS2)	Max (ignoring zero values) (RS2)	Mean (ignoring zero values) (RS2)	Standard Deviation (ignoring zero values) (RS2)	Skeletal Length (µm)	Skeletal Diameter (µm)			Area (µm2)	Min (RS2)	Max (RS2)	Mean (RS2)	Sum (RS2)	Standard Deviation (RS2)	Perimeter (µm)	Min (ignoring zero values) (RS2)	Max (ignoring zero values) (RS2)	Mean (ignoring zero values) (RS2)	Standard Deviation (ignoring zero values) (RS2)	Skeletal Length (µm)	Skeletal Diameter (µm)
	Sum	9942.37	560	2748	1059.36	2722604	480.35	5629.92	560	2748	1059.36	480.35	1658.98	74.06		Mean	284.07	16	78.51	30.27	77788.7	13.72	160.85	16	78.51	30.27	13.72	47.4	2.12
	Cx2	Area (µm2)	Min (RS2)	Max (RS2)	Mean (RS2)	Sum (RS2)	Standard Deviation (RS2)	Perimeter (µm)	Min (ignoring zero values) (RS2)	Max (ignoring zero values) (RS2)	Mean (ignoring zero values) (RS2)	Standard Deviation (ignoring zero values) (RS2)	Skeletal Length (µm)	Skeletal Diameter (µm)			Area (µm2)	Min (RS2)	Max (RS2)	Mean (RS2)	Sum (RS2)	Standard Deviation (RS2)	Perimeter (µm)	Min (ignoring zero values) (RS2)	Max (ignoring zero values) (RS2)	Mean (ignoring zero values) (RS2)	Standard Deviation (ignoring zero values) (RS2)	Skeletal Length (µm)	Skeletal Diameter (µm)
	Sum	13611.9	756	3510	1535.44	4674976	686.05	7115.86	756	3510	1535.44	686.05	2152.49	122.22		Mean	216.06	12	55.71	24.37	74206	10.89	112.95	12	55.71	24.37	10.89	34.17	1.94
	Cx3	Area (µm2)	Min (RS2)	Max (RS2)	Mean (RS2)	Sum (RS2)	Standard Deviation (RS2)	Perimeter (µm)	Min (ignoring zero values) (RS2)	Max (ignoring zero values) (RS2)	Mean (ignoring zero values) (RS2)	Standard Deviation (ignoring zero values) (RS2)	Skeletal Length (µm)	Skeletal Diameter (µm)			Area (µm2)	Min (RS2)	Max (RS2)	Mean (RS2)	Sum (RS2)	Standard Deviation (RS2)	Perimeter (µm)	Min (ignoring zero values) (RS2)	Max (ignoring zero values) (RS2)	Mean (ignoring zero values) (RS2)	Standard Deviation (ignoring zero values) (RS2)	Skeletal Length (µm)	Skeletal Diameter (µm)
	Sum	18222.2	576	2982	1083.02	5708222	540.37	9548.93	576	2982	1083.02	540.37	2386.79	96.33		Mean	379.63	12	62.12	22.56	118921	11.26	198.94	12	62.12	22.56	11.26	49.72	2.01
	Cx4	Area (µm2)	Min (RS2)	Max (RS2)	Mean (RS2)	Sum (RS2)	Standard Deviation (RS2)	Perimeter (µm)	Min (ignoring zero values) (RS2)	Max (ignoring zero values) (RS2)	Mean (ignoring zero values) (RS2)	Standard Deviation (ignoring zero values) (RS2)	Skeletal Length (µm)	Skeletal Diameter (µm)			Area (µm2)	Min (RS2)	Max (RS2)	Mean (RS2)	Sum (RS2)	Standard Deviation (RS2)	Perimeter (µm)	Min (ignoring zero values) (RS2)	Max (ignoring zero values) (RS2)	Mean (ignoring zero values) (RS2)	Standard Deviation (ignoring zero values) (RS2)	Skeletal Length (µm)	Skeletal Diameter (µm)
	Sum	15925.7	374	2054	732.7	5197295	337.8	7947.1	374	2054	732.7	337.8	2220.65	67.38		Mean	468.4	11	60.41	21.55	152862	9.94	233.74	11	60.41	21.55	9.94	65.31	1.98
	Cx5	Area (µm2)	Min (RS2)	Max (RS2)	Mean (RS2)	Sum (RS2)	Standard Deviation (RS2)	Perimeter (µm)	Min (ignoring zero values) (RS2)	Max (ignoring zero values) (RS2)	Mean (ignoring zero values) (RS2)	Standard Deviation (ignoring zero values) (RS2)	Skeletal Length (µm)	Skeletal Diameter (µm)			Area (µm2)	Min (RS2)	Max (RS2)	Mean (RS2)	Sum (RS2)	Standard Deviation (RS2)	Perimeter (µm)	Min (ignoring zero values) (RS2)	Max (ignoring zero values) (RS2)	Mean (ignoring zero values) (RS2)	Standard Deviation (ignoring zero values) (RS2)	Skeletal Length (µm)	Skeletal Diameter (µm)
	Sum	12164.5	468	2591	914.13	2782015	457.5	7461.03	468	2591	914.13	457.5	2165.68	79.72		Mean	311.91	12	66.44	23.44	71333.7	11.73	191.31	12	66.44	23.44	11.73	55.53	2.04
	Cx6	Area (µm2)	Min (RS2)	Max (RS2)	Mean (RS2)	Sum (RS2)	Standard Deviation (RS2)	Perimeter (µm)	Min (ignoring zero values) (RS2)	Max (ignoring zero values) (RS2)	Mean (ignoring zero values) (RS2)	Standard Deviation (ignoring zero values) (RS2)	Skeletal Length (µm)	Skeletal Diameter (µm)			Area (µm2)	Min (RS2)	Max (RS2)	Mean (RS2)	Sum (RS2)	Standard Deviation (RS2)	Perimeter (µm)	Min (ignoring zero values) (RS2)	Max (ignoring zero values) (RS2)	Mean (ignoring zero values) (RS2)	Standard Deviation (ignoring zero values) (RS2)	Skeletal Length (µm)	Skeletal Diameter (µm)
	Sum	18239.8	279	2343	642.68	4603902	402.54	9833.13	279	2343	642.68	402.54	2483.12	66.98		Mean	588.38	9	75.58	20.73	148513	12.99	317.2	9	75.58	20.73	12.99	80.1	2.16
	Cx7	Area (µm2)	Min (RS2)	Max (RS2)	Mean (RS2)	Sum (RS2)	Standard Deviation (RS2)	Perimeter (µm)	Min (ignoring zero values) (RS2)	Max (ignoring zero values) (RS2)	Mean (ignoring zero values) (RS2)	Standard Deviation (ignoring zero values) (RS2)	Skeletal Length (µm)	Skeletal Diameter (µm)			Area (µm2)	Min (RS2)	Max (RS2)	Mean (RS2)	Sum (RS2)	Standard Deviation (RS2)	Perimeter (µm)	Min (ignoring zero values) (RS2)	Max (ignoring zero values) (RS2)	Mean (ignoring zero values) (RS2)	Standard Deviation (ignoring zero values) (RS2)	Skeletal Length (µm)	Skeletal Diameter (µm)
	Sum	10247.4	440	3321	949.02	2529744	585.74	6507.4	440	3321	949.02	585.74	1988.67	83.32		Mean	256.19	11	83.03	23.73	63243.6	14.64	162.69	11	83.03	23.73	14.64	49.72	2.08
	Cx8	Area (µm2)	Min (RS2)	Max (RS2)	Mean (RS2)	Sum (RS2)	Standard Deviation (RS2)	Perimeter (µm)	Min (ignoring zero values) (RS2)	Max (ignoring zero values) (RS2)	Mean (ignoring zero values) (RS2)	Standard Deviation (ignoring zero values) (RS2)	Skeletal Length (µm)	Skeletal Diameter (µm)			Area (µm2)	Min (RS2)	Max (RS2)	Mean (RS2)	Sum (RS2)	Standard Deviation (RS2)	Perimeter (µm)	Min (ignoring zero values) (RS2)	Max (ignoring zero values) (RS2)	Mean (ignoring zero values) (RS2)	Standard Deviation (ignoring zero values) (RS2)	Skeletal Length (µm)	Skeletal Diameter (µm)
	Sum	13296.7	414	3481	904.1	1903857	589.93	9844.88	414	3481	904.1	589.93	3241.82	94.8		Mean	289.06	9	75.67	19.65	41388.2	12.82	214.02	9	75.67	19.65	12.82	70.47	2.06
	Cx9	Area (µm2)	Min (RS2)	Max (RS2)	Mean (RS2)	Sum (RS2)	Standard Deviation (RS2)	Perimeter (µm)	Min (ignoring zero values) (RS2)	Max (ignoring zero values) (RS2)	Mean (ignoring zero values) (RS2)	Standard Deviation (ignoring zero values) (RS2)	Skeletal Length (µm)	Skeletal Diameter (µm)			Area (µm2)	Min (RS2)	Max (RS2)	Mean (RS2)	Sum (RS2)	Standard Deviation (RS2)	Perimeter (µm)	Min (ignoring zero values) (RS2)	Max (ignoring zero values) (RS2)	Mean (ignoring zero values) (RS2)	Standard Deviation (ignoring zero values) (RS2)	Skeletal Length (µm)	Skeletal Diameter (µm)
	Sum	12678.4	430	2954	915.19	2509792	517.26	7309.54	430	2954	915.19	517.26	2296.2	89.84		Mean	294.85	10	68.7	21.28	58367.3	12.03	169.99	10	68.7	21.28	12.03	53.4	2.09
	Cx10	Area (µm2)	Min (RS2)	Max (RS2)	Mean (RS2)	Sum (RS2)	Standard Deviation (RS2)	Perimeter (µm)	Min (ignoring zero values) (RS2)	Max (ignoring zero values) (RS2)	Mean (ignoring zero values) (RS2)	Standard Deviation (ignoring zero values) (RS2)	Skeletal Length (µm)	Skeletal Diameter (µm)			Area (µm2)	Min (RS2)	Max (RS2)	Mean (RS2)	Sum (RS2)	Standard Deviation (RS2)	Perimeter (µm)	Min (ignoring zero values) (RS2)	Max (ignoring zero values) (RS2)	Mean (ignoring zero values) (RS2)	Standard Deviation (ignoring zero values) (RS2)	Skeletal Length (µm)	Skeletal Diameter (µm)
	Sum	15483.5	440	3114	1035.83	4987251	596.1	8731.32	440	3114	1035.83	596.1	2449.75	86.68		Mean	387.09	11	77.85	25.9	124681	14.9	218.28	11	77.85	25.9	14.9	61.24	2.17
F2
	Cx1	Area (µm2)	Min (RS2)	Max (RS2)	Mean (RS2)	Sum (RS2)	Standard Deviation (RS2)	Perimeter (µm)	Min (ignoring zero values) (RS2)	Max (ignoring zero values) (RS2)	Mean (ignoring zero values) (RS2)	Standard Deviation (ignoring zero values) (RS2)	Skeletal Length (µm)	Skeletal Diameter (µm)			Area (µm2)	Min (RS2)	Max (RS2)	Mean (RS2)	Sum (RS2)	Standard Deviation (RS2)	Perimeter (µm)	Min (ignoring zero values) (RS2)	Max (ignoring zero values) (RS2)	Mean (ignoring zero values) (RS2)	Standard Deviation (ignoring zero values) (RS2)	Skeletal Length (µm)	Skeletal Diameter (µm)
	Sum	19174	248	2314	709.47	5059703	499.44	9423.39	248	2314	709.47	499.44	2048.85	63.34		Mean	618.52	8	74.65	22.89	163216	16.11	303.98	8	74.65	22.89	16.11	66.09	2.04
	Cx2	Area (µm2)	Min (RS2)	Max (RS2)	Mean (RS2)	Sum (RS2)	Standard Deviation (RS2)	Perimeter (µm)	Min (ignoring zero values) (RS2)	Max (ignoring zero values) (RS2)	Mean (ignoring zero values) (RS2)	Standard Deviation (ignoring zero values) (RS2)	Skeletal Length (µm)	Skeletal Diameter (µm)			Area (µm2)	Min (RS2)	Max (RS2)	Mean (RS2)	Sum (RS2)	Standard Deviation (RS2)	Perimeter (µm)	Min (ignoring zero values) (RS2)	Max (ignoring zero values) (RS2)	Mean (ignoring zero values) (RS2)	Standard Deviation (ignoring zero values) (RS2)	Skeletal Length (µm)	Skeletal Diameter (µm)
	Sum	20157.9	171	1498	435.9	6125712	265.42	7958.02	171	1498	435.9	265.42	1351.21	42.37		Mean	1060.94	9	78.84	22.94	322406	13.97	418.84	9	78.84	22.94	13.97	71.12	2.23
	Cx3	Area (µm2)	Min (RS2)	Max (RS2)	Mean (RS2)	Sum (RS2)	Standard Deviation (RS2)	Perimeter (µm)	Min (ignoring zero values) (RS2)	Max (ignoring zero values) (RS2)	Mean (ignoring zero values) (RS2)	Standard Deviation (ignoring zero values) (RS2)	Skeletal Length (µm)	Skeletal Diameter (µm)			Area (µm2)	Min (RS2)	Max (RS2)	Mean (RS2)	Sum (RS2)	Standard Deviation (RS2)	Perimeter (µm)	Min (ignoring zero values) (RS2)	Max (ignoring zero values) (RS2)	Mean (ignoring zero values) (RS2)	Standard Deviation (ignoring zero values) (RS2)	Skeletal Length (µm)	Skeletal Diameter (µm)
	Sum	19382.7	324	1784	643.02	4631839	310.36	9176.74	324	1784	643.02	310.36	2028.96	72.17		Mean	538.41	9	49.56	17.86	128662	8.62	254.91	9	49.56	17.86	8.62	56.36	2
	Cx4	Area (µm2)	Min (RS2)	Max (RS2)	Mean (RS2)	Sum (RS2)	Standard Deviation (RS2)	Perimeter (µm)	Min (ignoring zero values) (RS2)	Max (ignoring zero values) (RS2)	Mean (ignoring zero values) (RS2)	Standard Deviation (ignoring zero values) (RS2)	Skeletal Length (µm)	Skeletal Diameter (µm)			Area (µm2)	Min (RS2)	Max (RS2)	Mean (RS2)	Sum (RS2)	Standard Deviation (RS2)	Perimeter (µm)	Min (ignoring zero values) (RS2)	Max (ignoring zero values) (RS2)	Mean (ignoring zero values) (RS2)	Standard Deviation (ignoring zero values) (RS2)	Skeletal Length (µm)	Skeletal Diameter (µm)
	Sum	20705.4	490	3131	1012.54	5747875	524.31	10037.3	490	3131	1012.54	524.31	2461.71	98.65		Mean	422.56	10	63.9	20.66	117304	10.7	204.84	10	63.9	20.66	10.7	50.24	2.01
	Cx5	Area (µm2)	Min (RS2)	Max (RS2)	Mean (RS2)	Sum (RS2)	Standard Deviation (RS2)	Perimeter (µm)	Min (ignoring zero values) (RS2)	Max (ignoring zero values) (RS2)	Mean (ignoring zero values) (RS2)	Standard Deviation (ignoring zero values) (RS2)	Skeletal Length (µm)	Skeletal Diameter (µm)			Area (µm2)	Min (RS2)	Max (RS2)	Mean (RS2)	Sum (RS2)	Standard Deviation (RS2)	Perimeter (µm)	Min (ignoring zero values) (RS2)	Max (ignoring zero values) (RS2)	Mean (ignoring zero values) (RS2)	Standard Deviation (ignoring zero values) (RS2)	Skeletal Length (µm)	Skeletal Diameter (µm)
	Sum	12024.2	416	2417	802.96	2075956	391.17	8212.33	416	2417	802.96	391.17	2468.66	100		Mean	231.23	8	46.48	15.44	39922.2	7.52	157.93	8	46.48	15.44	7.52	47.47	1.92
	Cx6	Area (µm2)	Min (RS2)	Max (RS2)	Mean (RS2)	Sum (RS2)	Standard Deviation (RS2)	Perimeter (µm)	Min (ignoring zero values) (RS2)	Max (ignoring zero values) (RS2)	Mean (ignoring zero values) (RS2)	Standard Deviation (ignoring zero values) (RS2)	Skeletal Length (µm)	Skeletal Diameter (µm)			Area (µm2)	Min (RS2)	Max (RS2)	Mean (RS2)	Sum (RS2)	Standard Deviation (RS2)	Perimeter (µm)	Min (ignoring zero values) (RS2)	Max (ignoring zero values) (RS2)	Mean (ignoring zero values) (RS2)	Standard Deviation (ignoring zero values) (RS2)	Skeletal Length (µm)	Skeletal Diameter (µm)
	Sum	15881.6	342	2369	760.19	3648549	436.17	9160.89	342	2369	760.19	436.17	2241.83	74.72		Mean	417.94	9	62.34	20	96014.4	11.48	241.08	9	62.34	20	11.48	59	1.97
	Cx7	Area (µm2)	Min (RS2)	Max (RS2)	Mean (RS2)	Sum (RS2)	Standard Deviation (RS2)	Perimeter (µm)	Min (ignoring zero values) (RS2)	Max (ignoring zero values) (RS2)	Mean (ignoring zero values) (RS2)	Standard Deviation (ignoring zero values) (RS2)	Skeletal Length (µm)	Skeletal Diameter (µm)			Area (µm2)	Min (RS2)	Max (RS2)	Mean (RS2)	Sum (RS2)	Standard Deviation (RS2)	Perimeter (µm)	Min (ignoring zero values) (RS2)	Max (ignoring zero values) (RS2)	Mean (ignoring zero values) (RS2)	Standard Deviation (ignoring zero values) (RS2)	Skeletal Length (µm)	Skeletal Diameter (µm)
	Sum	14759.3	423	3950	1096.18	3540520	735.35	8424.64	423	3950	1096.18	735.35	2643.47	98.12		Mean	314.03	9	84.04	23.32	75330.2	15.65	179.25	9	84.04	23.32	15.65	56.24	2.09
	Cx8	Area (µm2)	Min (RS2)	Max (RS2)	Mean (RS2)	Sum (RS2)	Standard Deviation (RS2)	Perimeter (µm)	Min (ignoring zero values) (RS2)	Max (ignoring zero values) (RS2)	Mean (ignoring zero values) (RS2)	Standard Deviation (ignoring zero values) (RS2)	Skeletal Length (µm)	Skeletal Diameter (µm)			Area (µm2)	Min (RS2)	Max (RS2)	Mean (RS2)	Sum (RS2)	Standard Deviation (RS2)	Perimeter (µm)	Min (ignoring zero values) (RS2)	Max (ignoring zero values) (RS2)	Mean (ignoring zero values) (RS2)	Standard Deviation (ignoring zero values) (RS2)	Skeletal Length (µm)	Skeletal Diameter (µm)
	Sum	19505.6	297	3490	904.57	4735979	638.31	10162.3	297	3490	904.57	638.31	2888.38	71.57		Mean	591.08	9	105.76	27.41	143515	19.34	307.95	9	105.76	27.41	19.34	87.53	2.17
	Cx9	Area (µm2)	Min (RS2)	Max (RS2)	Mean (RS2)	Sum (RS2)	Standard Deviation (RS2)	Perimeter (µm)	Min (ignoring zero values) (RS2)	Max (ignoring zero values) (RS2)	Mean (ignoring zero values) (RS2)	Standard Deviation (ignoring zero values) (RS2)	Skeletal Length (µm)	Skeletal Diameter (µm)			Area (µm2)	Min (RS2)	Max (RS2)	Mean (RS2)	Sum (RS2)	Standard Deviation (RS2)	Perimeter (µm)	Min (ignoring zero values) (RS2)	Max (ignoring zero values) (RS2)	Mean (ignoring zero values) (RS2)	Standard Deviation (ignoring zero values) (RS2)	Skeletal Length (µm)	Skeletal Diameter (µm)
	Sum	13847.1	330	3199	885.71	3181993	580.77	7108.72	330	3199	885.71	580.77	2252.06	66.57		Mean	419.61	10	96.94	26.84	96424	17.6	215.42	10	96.94	26.84	17.6	68.24	2.02
	Cx10	Area (µm2)	Min (RS2)	Max (RS2)	Mean (RS2)	Sum (RS2)	Standard Deviation (RS2)	Perimeter (µm)	Min (ignoring zero values) (RS2)	Max (ignoring zero values) (RS2)	Mean (ignoring zero values) (RS2)	Standard Deviation (ignoring zero values) (RS2)	Skeletal Length (µm)	Skeletal Diameter (µm)			Area (µm2)	Min (RS2)	Max (RS2)	Mean (RS2)	Sum (RS2)	Standard Deviation (RS2)	Perimeter (µm)	Min (ignoring zero values) (RS2)	Max (ignoring zero values) (RS2)	Mean (ignoring zero values) (RS2)	Standard Deviation (ignoring zero values) (RS2)	Skeletal Length (µm)	Skeletal Diameter (µm)
	Sum	12221.7	448	4396	1223.19	2316975	837.68	7954.76	448	4396	1223.19	837.68	2509.45	111.9		Mean	218.24	8	78.5	21.84	41374.6	14.96	142.05	8	78.5	21.84	14.96	44.81	2

## Sheet: LO_sum
Quantify ICAM1 area in FoV
		SUM						MEAN
F1		Area (µm2)	Perimeter (µm)	Mean (ignoring zero values) (RS2)	Skeletal Length (µm)	Skeletal Diameter (µm)		Mean (ignoring zero values) (RS2)
	Cx1	9942.37	5629.92	1059.36	1658.98	74.06		30.27				AVG	Area (µm2)	Perimeter (µm)	Mean (ignoring zero values) (RS2)	Skeletal Length (µm)	Skeletal Diameter (µm)	Mean (ignoring zero values) (RS2)
	Cx2	13611.9	7115.86	1535.44	2152.49	122.22		24.37				F1	13981.2	7992.91	977.147	2304.41	86.133	23.348
	Cx3	18222.2	9548.93	1083.02	2386.79	96.33		22.56				F2	16766	8761.91	847.373	2289.46	79.941	21.92
	Cx4	15925.7	7947.1	732.7	2220.65	67.38		21.55
	Cx5	12164.5	7461.03	914.13	2165.68	79.72		23.44
	Cx6	18239.8	9833.13	642.68	2483.12	66.98		20.73
	Cx7	10247.4	6507.4	949.02	1988.67	83.32		23.73
	Cx8	13296.7	9844.88	904.1	3241.82	94.8		19.65
	Cx9	12678.4	7309.54	915.19	2296.2	89.84		21.28
	Cx10	15483.5	8731.32	1035.83	2449.75	86.68		25.9
	AVG	Area (µm2)	Perimeter (µm)	Mean (ignoring zero values) (RS2)	Skeletal Length (µm)	Skeletal Diameter (µm)		Mean (ignoring zero values) (RS2)
	CX	13981.2	7992.91	977.147	2304.41	86.133		23.348
F2		Area (µm2)	Perimeter (µm)	Mean (ignoring zero values) (RS2)	Skeletal Length (µm)	Skeletal Diameter (µm)		Mean (ignoring zero values) (RS2)
	Cx1	19174	9423.39	709.47	2048.85	63.34		22.89
	Cx2	20157.9	7958.02	435.9	1351.21	42.37		22.94
	Cx3	19382.7	9176.74	643.02	2028.96	72.17		17.86
	Cx4	20705.4	10037.3	1012.54	2461.71	98.65		20.66
	Cx5	12024.2	8212.33	802.96	2468.66	100		15.44
	Cx6	15881.6	9160.89	760.19	2241.83	74.72		20
	Cx7	14759.3	8424.64	1096.18	2643.47	98.12		23.32
	Cx8	19505.6	10162.3	904.57	2888.38	71.57		27.41
	Cx9	13847.1	7108.72	885.71	2252.06	66.57		26.84
	Cx10	12221.7	7954.76	1223.19	2509.45	111.9		21.84
	AVG	Area (µm2)	Perimeter (µm)	Mean (ignoring zero values) (RS2)	Skeletal Length (µm)	Skeletal Diameter (µm)		Mean (ignoring zero values) (RS2)
	CX	16766	8761.91	847.373	2289.46	79.941		21.92

## Sheet: total sum
			SUM					MEAN
		WT_AVG	Area (µm2)	Perimeter (µm)	Mean (ignoring zero values) (RS2)	Skeletal Length (µm)	Skeletal Diameter (µm)	Mean (ignoring zero values) (RS2)
		128745	6297.31	5025.01	413.976	1739.94	73.096	11.002
		128746	7461.97	4708.68	320.071	1578.15	73.193	8.835
			SUM					MEAN
		AVG	Area (µm2)	Perimeter (µm)	Mean (ignoring zero values) (RS2)	Skeletal Length (µm)	Skeletal Diameter (µm)	Mean (ignoring zero values) (RS2)
		411_1L	11216	6596.08	575.974	2067.45	81.221	15.591
		411_2R	9203.65	4902.15	300.928	1433.01	41.177	15.532
		425	15553.2	8411.28	634.661	2336.97	66.062	20.625
			SUM					MEAN
		AVG	Area (µm2)	Perimeter (µm)	Mean (ignoring zero values) (RS2)	Skeletal Length (µm)	Skeletal Diameter (µm)	Mean (ignoring zero values) (RS2)
		F1	13981.2	7992.91	977.147	2304.41	86.133	23.348
		F2	16766	8761.91	847.373	2289.46	79.941	21.92

## Sheet: SUMMARY
	Figure 5-source data 1
	Source data for Figure 5D
	Quantification of ICAM-1+ vessel area and immunohistochemistry signal intensity
	CONTROL (w003)						CONTROL (w003)
	Id.	FOV	Area (µm2)	Mean intensity			Id.	Area (µm2)	Mean intensity
	128745	Cx1	5016.34	11.28			128745	6297.31	11.002
		Cx2	8511.64	12.71			128746	7461.97	8.835
		Cx3	9968.57	9.99			AVG	6879.64	9.9185
		Cx4	7155.19	10.92			STDEV	823.538	1.5323
		Cx5	5123.36	9.87			SEM	582.33	1.0835
		Cx6	6871.01	11.8
		Cx7	2998.29	10.68			EARLY ONSET (EO)
		Cx8	8188.69	11.32			Id.	Area (µm2)	Mean intensity
		Cx9	3183.72	10.52			411_1L	11216	15.591
		Cx10	5956.25	10.93			411_2R	9203.65	15.532
		AVG	6297.31	11.002			425	15553.2	20.625
							AVG	11991	17.2493
	128746	Cx1	3231.46	8.19			STDEV	3244.95	2.92356
		Cx2	4328.2	8.64			SEM	1873.47	1.68792
		Cx3	10251.2	10.45
		Cx4	6198.9	8.59			PEAK (LO)
		Cx5	11909.4	9.96			Id.	Area (µm2)	Mean intensity
		Cx6	10458.2	8.82			F1	13981.2	23.348
		Cx7	6454.65	7.84			F2	16766	21.92
		Cx8	4105.72	8.75			AVG	15373.6	22.634
		Cx9	6907.03	8.54			STDEV	1969.09	1.00975
		Cx10	10774.9	8.57			SEM	1392.36	0.714
		AVG	7461.97	8.835
	EAE ONSET (EO)
	Id.	FOV	Area (µm2)	Mean intensity
	411_1L	Cx1	13387.7	16.02
		Cx2	9883.43	17.25
		Cx3	8397.9	13.1
		Cx4	16790.8	17.08
		Cx5	10071.5	9.06
		Cx6	8692.77	12.87
		Cx7	12425.2	18.99
		Cx8	14462.9	18.32
		Cx9	10542.4	14.55
		Cx10	7505.2	18.67
		AVG	11216	15.591
	411_2R	Cx1	9712.99	12.19
		Cx2	15214.3	15.85
		Cx3	5206.77	12.11
		Cx4	9325.75	13.17
		Cx5	5903	12.13
		Cx6	10337.4	15.36
		Cx7	8577.3	15.88
		Cx8	10338.7	18.07
		Cx9	8832.88	25.51
		Cx10	8587.47	15.05
		AVG	9203.65	15.532
	425	Cx1	13552.5	19.51
		Cx2	17678.5	22.41
		Cx3	12820	19.84
		Cx4	16800.1	18.06
		Cx5	8621.08	20.92
		Cx6	19408.8	14.48
		Cx7	22930.4	20.37
		Cx8	15766.1	19.81
		Cx9	19806	22.82
		Cx10	8148.88	28.03
		AVG	15553.2	20.625
	EAE PEAK (LO)
	Id.	FOV	Area (µm2)	Mean intensity
	F1	Cx1	9942.37	30.27
		Cx2	13611.9	24.37
		Cx3	18222.2	22.56
		Cx4	15925.7	21.55
		Cx5	12164.5	23.44
		Cx6	18239.8	20.73
		Cx7	10247.4	23.73
		Cx8	13296.7	19.65
		Cx9	12678.4	21.28
		Cx10	15483.5	25.9
		AVG	13981.2	23.348
	F2	Cx1	19174	22.89
		Cx2	20157.9	22.94
		Cx3	19382.7	17.86
		Cx4	20705.4	20.66
		Cx5	12024.2	15.44
		Cx6	15881.6	20
		Cx7	14759.3	23.32
		Cx8	19505.6	27.41
		Cx9	13847.1	26.84
		Cx10	12221.7	21.84
		AVG	16766	21.92
