# Supplementary material for: Single-cell transcriptomics reveals functionally specialized vascular endothelium in brain
Source: eLife. 2022 Oct 5;11:e57520. doi: 10.7554/eLife.57520 (PMC9566870; doi:10.7554/eLife.57520)
Supplement: Figure 6—source data 1. [file elife-57520-fig6-data1.xlsx]

## Sheet: EO
411_1L		Vessel associated CD206+ cells		Not vessel associated CD206+ cells		TOTAL
	Cx1	0		0		0
	Cx2	7		0		7			Vessel associated CD206+ cells	Not vessel associated CD206+ cells	TOTAL
	Cx3	5		10		15		411_1L	61	21	82
	Cx4	13		3		16		411_2R	34	16	50
	Cx5	9		1		10		425	67	6	73
	Cx6	11		7		18
	Cx7	0		0		0
	Cx8	4		0		4
	Cx9	9		0		9
	Cx10	3		0		3
411_2R
	Cx1	12		1		13
	Cx2	0		0		0
	Cx3	1		11		12
	Cx4	2		0		2
	Cx5	2		0		2
	Cx6	1		0		1
	Cx7	6		2		8
	Cx8	2		2		4
	Cx9	0		0		0
	Cx10	8		0		8
425
	Cx1	0		0		0
	Cx2	8		0		8
	Cx3	2		3		5
	Cx4	14		0		14
	Cx5	0		0		0
	Cx6	7		0		7
	Cx7	19		0		19
	Cx8	2		0		2
	Cx9	14		2		16
	Cx10	1		1		2

## Sheet: LO
F1		Vessel associated CD206+ cells		Not vessel associated CD206+ cells		TOTAL
	Cx1	3		3		6
	Cx2	7		7		14			Va CD206+ cells	non Va Cd206+ cells	total no of cd206+ cells
	Cx3	10		2		12		F1	47	19	66
	Cx4	11		3		14		F2	53	26	79
	Cx5	2		0		2
	Cx6	1		0		1
	Cx7	6		2		8
	Cx8	5		1		6
	Cx9	0		0		0
	Cx10	2		1		3
F2
	Cx1	3		0		3
	Cx2	6		1		7
	Cx3	4		3		7
	Cx4	6		3		9
	Cx5	7		3		10
	Cx6	6		5		11
	Cx7	3		3		6
	Cx8	7		1		8
	Cx9	4		1		5
	Cx10	7		6		13

## Sheet: WT
128745		Vessel associated CD206+ cells		Not vessel associated CD206+ cells			TOTAL
	Cx1	15		1			16			Va CD206+ cells	Non Va CD206+ cells	Total CD206+ cells
	Cx2	6		3			9		128745	67	31	98
	Cx3	12		7			19		128746	105	43	148
	Cx4	4		0			4
	Cx5	13		0			13
	Cx6	12		3			15
	Cx7	2		6			8
	Cx8	3		3			6
	Cx9	0		8			8
	Cx10	0		0			0
128746
	Cx1	19		4			23
	Cx2	12		4			16
	Cx3	12		1			13
	Cx4	4		5			9
	Cx5	13		9			22
	Cx6	12		1			13
	Cx7	13		3			16
	Cx8	4		11			15
	Cx9	11		4			15
	Cx10	5		1			6

## Sheet: SUMMARY
	Figure 6-source data
	Source data for Figure 6B
	Frequency of CD206+ PVMs associated to ICAM-1+ vessels in brain cortical parenchyma
	CONTROL (w003)
	Id.	FOV	Vessel associated CD206+ cells	%	Not vessel associated CD206+ cells	%	TOTAL			CONTROL (w003)
	128745	Cx1	15	93.75	1	6.25	16			Id.	Vessel associated CD206+ cells	%	Not vessel associated CD206+ cells	%	TOTAL
		Cx2	6	66.6667	3	33.3333	9			128745	67	68.3673	31	31.6327	98
		Cx3	12	63.1579	7	36.8421	19			128746	105	70.9459	43	29.0541	148
		Cx4	4	100	0	0	4			AVG		69.6566		30.3434	123
		Cx5	13	100	0	0	13			STDEV		1.82334		1.82334	35.3553
		Cx6	12	80	3	20	15			SEM		1.2893		1.2893	25
		Cx7	2	25	6	75	8
		Cx8	3	50	3	50	6			EARLY ONSET (EO)
		Cx9	0	0	8	100	8			Id.	Vessel associated CD206+ cells	%	Not vessel associated CD206+ cells	%	TOTAL
		Cx10	0	0	0	0	0			411_1L	61	74.3902	21	25.6098	82
		AVG	6.7	57.8575	3.1	32.1425	9.8			411_2R	34	68	16	32	50
	128746	Cx1	19	82.6087	4	17.3913	23			AVG		71.1951		28.8049	50
		Cx2	12	75	4	25	16			STDEV		4.51858		4.51858	#DIV/0!
		Cx3	12	92.3077	1	7.69231	13			SEM		2.60881		2.60881	#DIV/0!
		Cx4	4	44.4444	5	55.5556	9
		Cx5	13	59.0909	9	40.9091	22			EAE PEAK (LO)
		Cx6	12	92.3077	1	7.69231	13			Id.	Vessel associated CD206+ cells	%	Not vessel associated CD206+ cells	%	TOTAL
		Cx7	13	81.25	3	18.75	16			F1	47	71.2121	19	28.7879	66
		Cx8	4	26.6667	11	73.3333	15			F2	53	67.0886	26	32.9114	79
		Cx9	11	73.3333	4	26.6667	15			AVG		69.1504		30.8496	72.5
		Cx10	5	83.3333	1	16.6667	6			STDEV		2.91576		2.91576	9.19239
		AVG	10.5	71.0343	4.3	28.9657	14.8			SEM		2.06176		2.06176	6.5
	EAE ONSET (EO)
	Id.	FOV	Vessel associated CD206+ cells	%	Not vessel associated CD206+ cells	%	TOTAL
	411_1L	Cx1	0		0		0
		Cx2	7	100	0	0	7
		Cx3	5	33.3333	10	66.6667	15
		Cx4	13	81.25	3	18.75	16
		Cx5	9	90	1	10	10
		Cx6	11	61.1111	7	38.8889	18
		Cx7	0		0		0
		Cx8	4	100	0	0	4
		Cx9	9	100	0	0	9
		Cx10	3	100	0	0	3
		AVG	6.1	83.2118	2.1	16.7882	8.2
							0
	411_2R	Cx1	12	92.3077	1	7.69231	13
		Cx2	0		0		0
		Cx3	1	8.33333	11	91.6667	12
		Cx4	2	100	0	0	2
		Cx5	2	100	0	0	2
		Cx6	1	100	0	0	1
		Cx7	6	75	2	25	8
		Cx8	2	50	2	50	4
		Cx9	0		0		0
		Cx10	8	100	0	0	8
		AVG	3.4	78.2051	1.6	21.7949	5
							0
	425	Cx1	0		0		0
		Cx2	8	100	0	0	8
		Cx3	2	40	3	60	5
		Cx4	14	100	0	0	14
		Cx5	0		0		0
		Cx6	7	100	0	0	7
		Cx7	19	100	0	0	19
		Cx8	2	100	0	0	2
		Cx9	14	87.5	2	12.5	16
		Cx10	1	50	1	50	2
		AVG	6.7	84.6875	0.6	15.3125	7.3
	EAE PEAK (LO)
	Id.	FOV	Vessel associated CD206+ cells	%	Not vessel associated CD206+ cells	%	TOTAL
	F1	Cx1	3	50	3	50	56
		Cx2	7	50	7	50	64
		Cx3	10	83.3333	2	16.6667	95.3333
		Cx4	11	78.5714	3	21.4286	92.5714
		Cx5	2	100	0	0	102
		Cx6	1	100	0	0	101
		Cx7	6	75	2	25	83
		Cx8	5	83.3333	1	16.6667	89.3333
		Cx9	0		0		0
		Cx10	2	66.6667	1	33.3333	69.6667
		AVG	4.7	76.3228	1.9	23.6772	6.6
	F2	Cx1	3	100	0	0	103
		Cx2	6	85.7143	1	14.2857	92.7143
		Cx3	4	57.1429	3	42.8571	64.1429
		Cx4	6	66.6667	3	33.3333	75.6667
		Cx5	7	70	3	30	80
		Cx6	6	54.5455	5	45.4545	65.5455
		Cx7	3	50	3	50	56
		Cx8	7	87.5	1	12.5	95.5
		Cx9	4	80	1	20	85
		Cx10	7	53.8462	6	46.1538	66.8462
		AVG	5.3	70.5415	2.6	29.4585	7.9
