# Supplementary material for: Single-cell transcriptomics reveals functionally specialized vascular endothelium in brain
Source: eLife journal article supplement (doi:10.7554/elife.57520), 2022-10-05
Supplement: supp [file elife-57520-supp-v1.zip]

**A**

Perfusion with cold PBS

Cerebral cortex dissection / mincing

- Juvenile (P10, n=6)
- Adult (7-11wk, n=6)
- Aged (18mo, n=3)
- EAE (7-11wk, n=3)

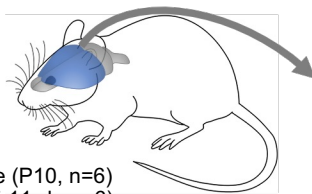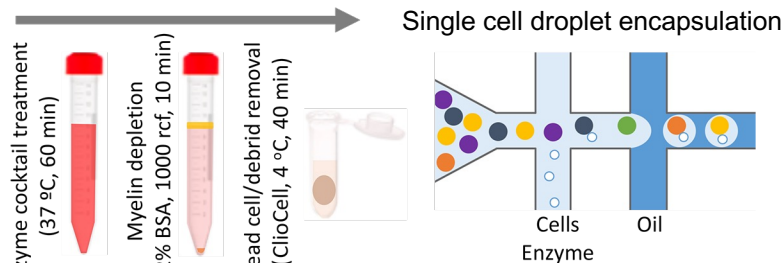**B**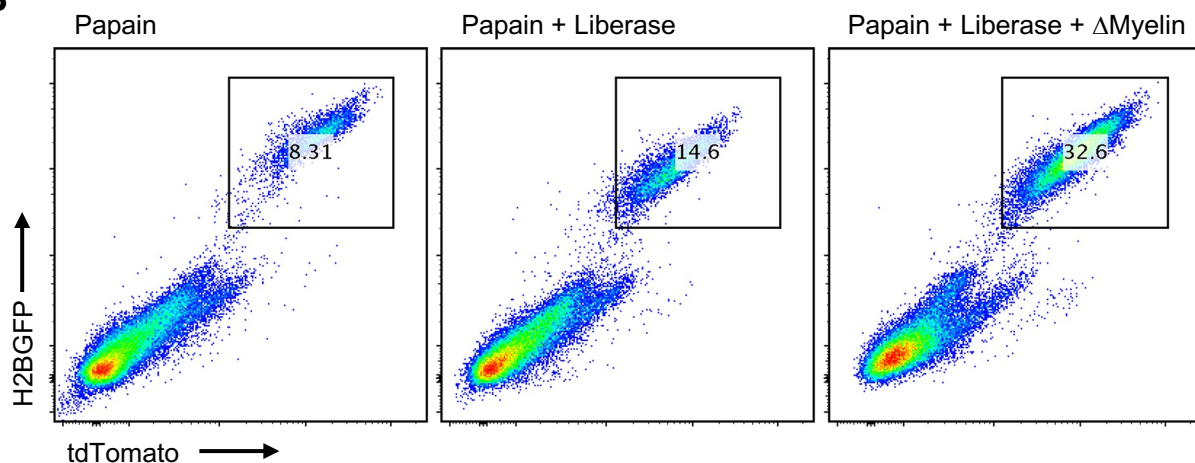**C**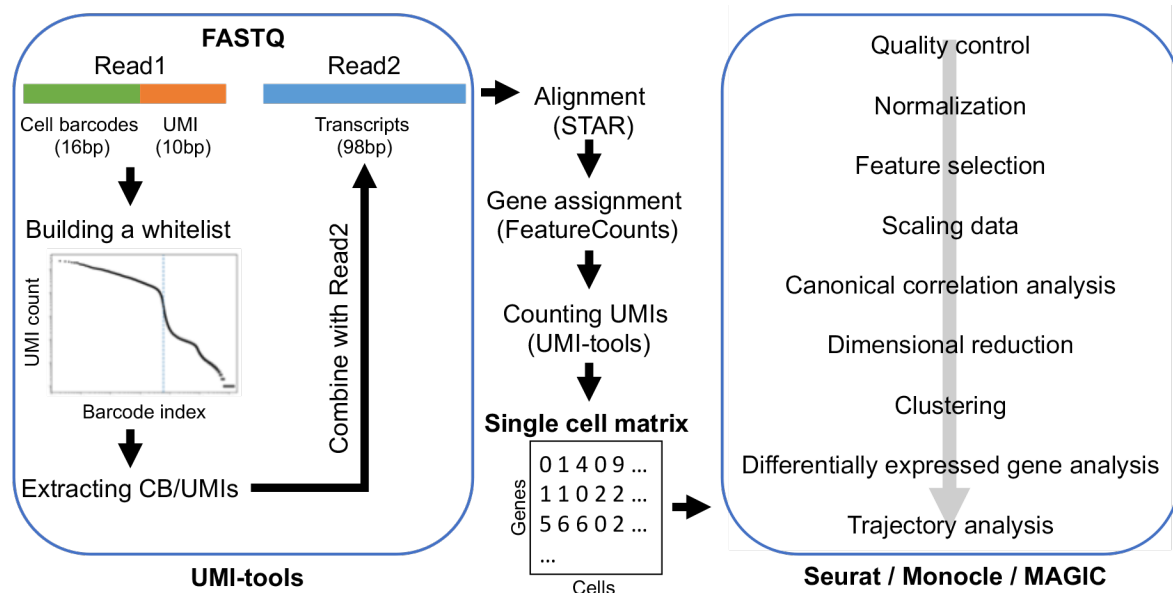

Figure 1-figure supplement 1. Jeong et al.
