# Supplementary figures and images for: Single-cell transcriptomics reveals functionally specialized vascular endothelium in brain
Source: eLife journal article supplement (doi:10.7554/elife.57520), 2022-10-05

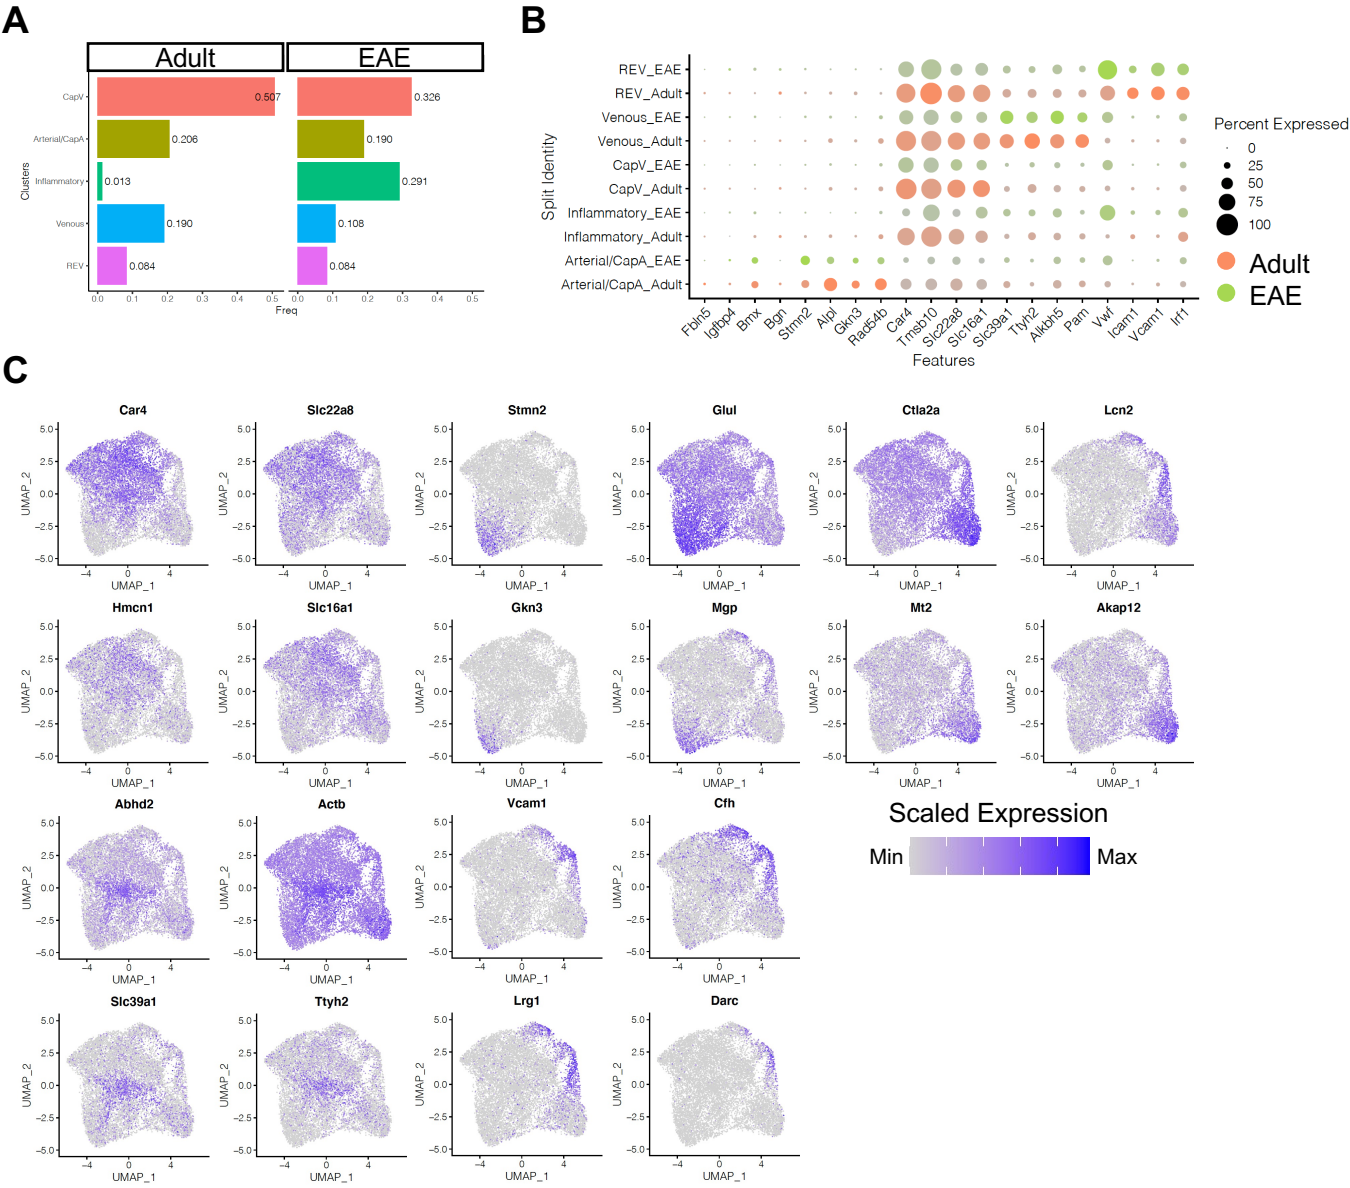

Supplement: supp [file elife-57520-supp-v1.zip]

**A**

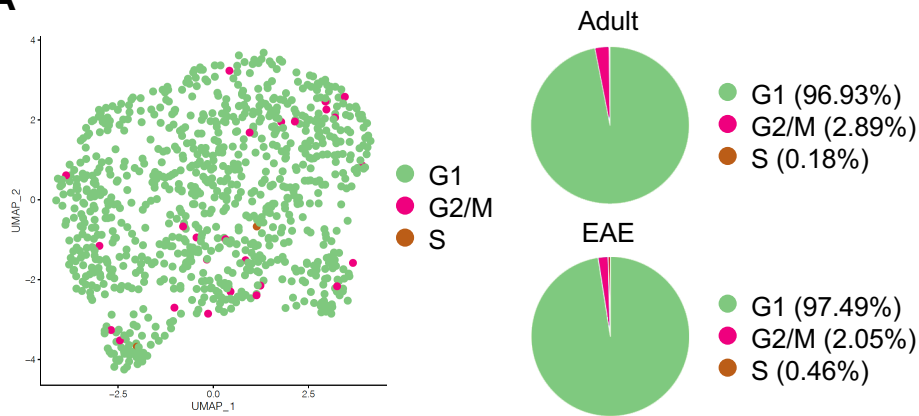

**B**

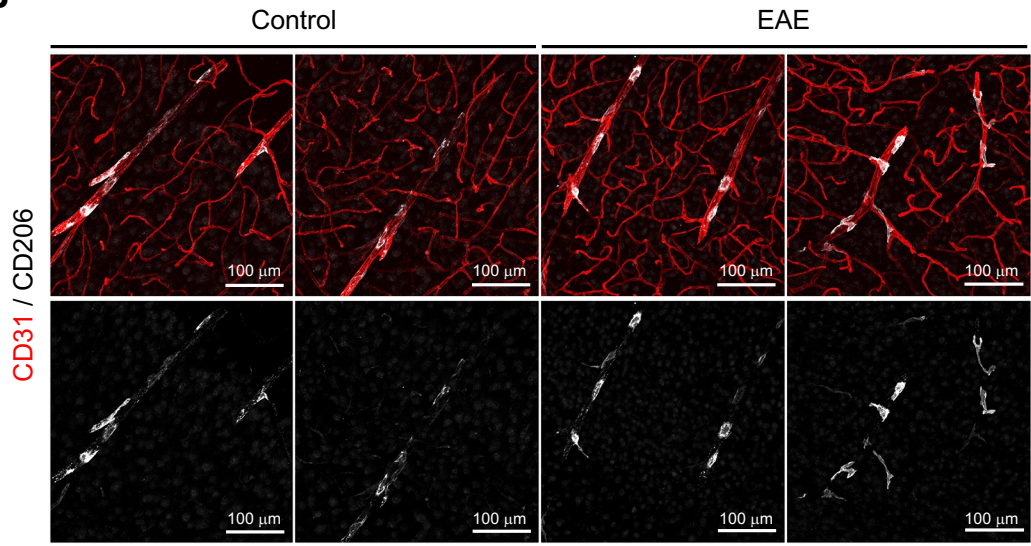

Figure 6-figure supplement 1. Jeong et al.

Supplement: supp [file elife-57520-supp-v1.zip]

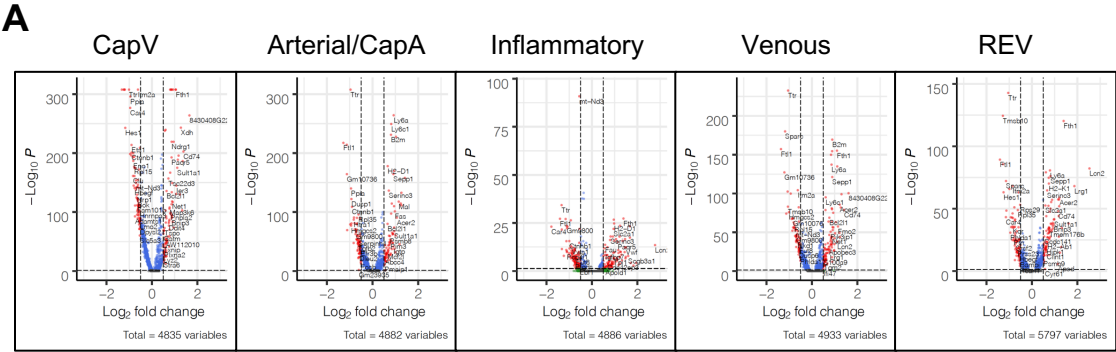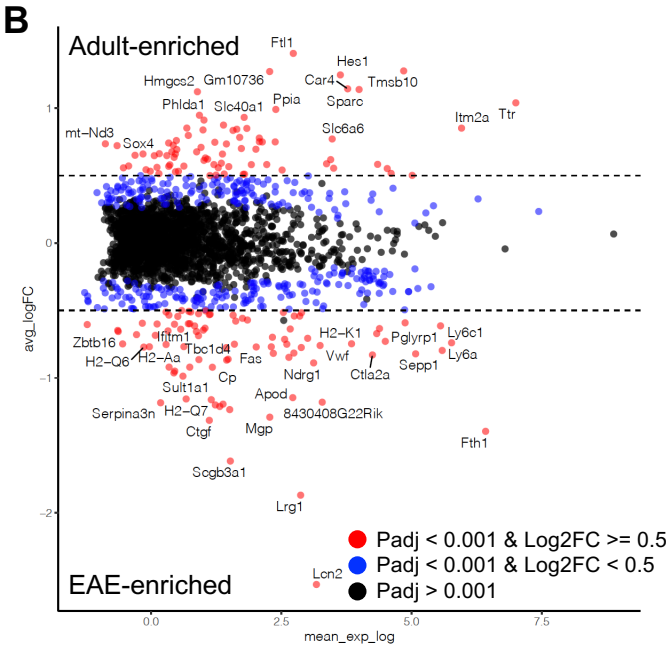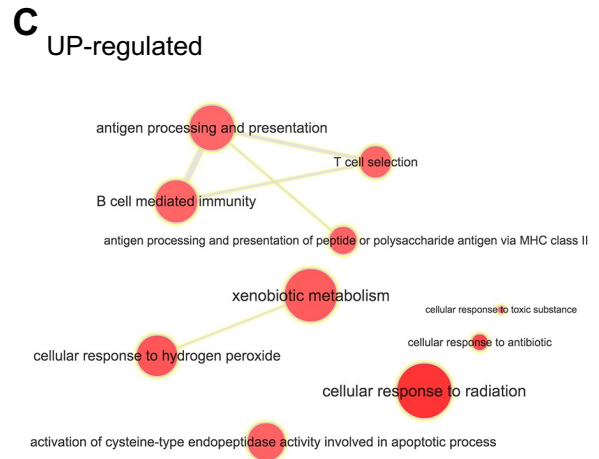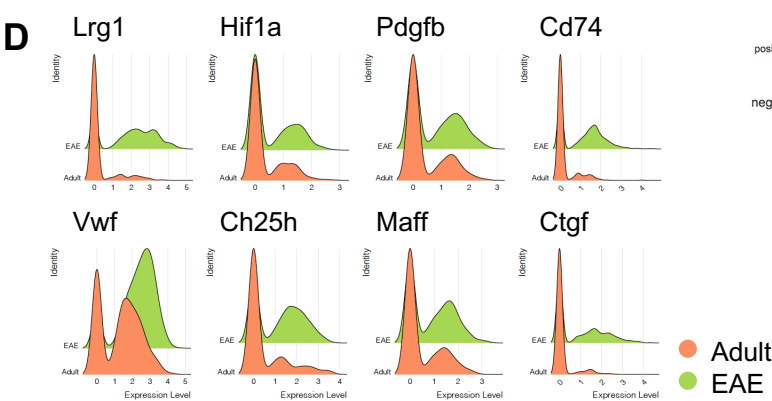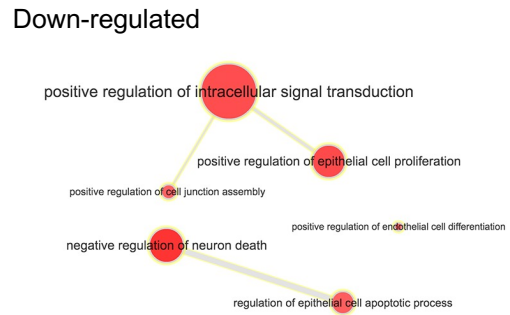

Figure 5-figure supplement 4. Jeong et al.

Supplement: supp [file elife-57520-supp-v1.zip]

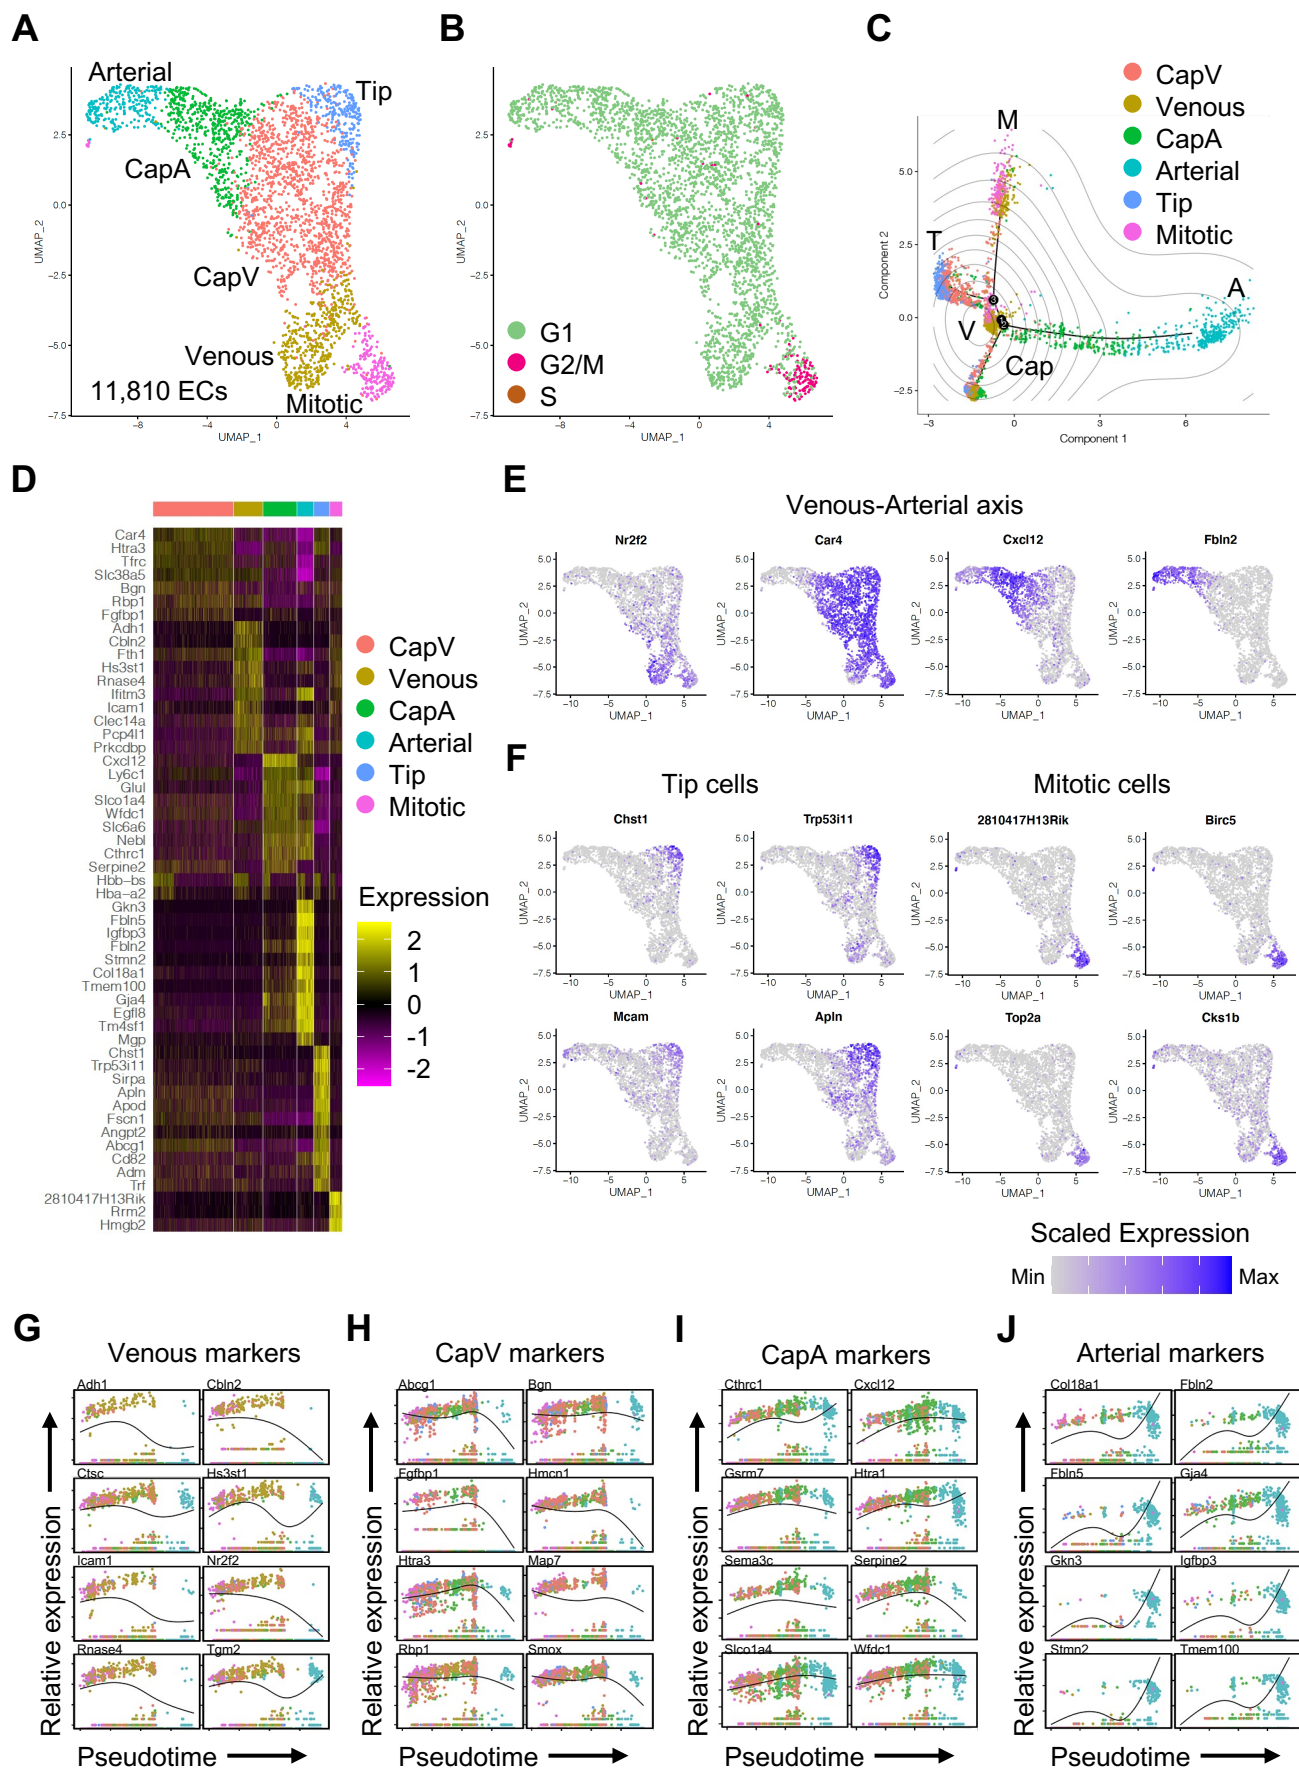

Figure 2-figure supplement 1. Jeong et al.

Supplement: supp [file elife-57520-supp-v1.zip]

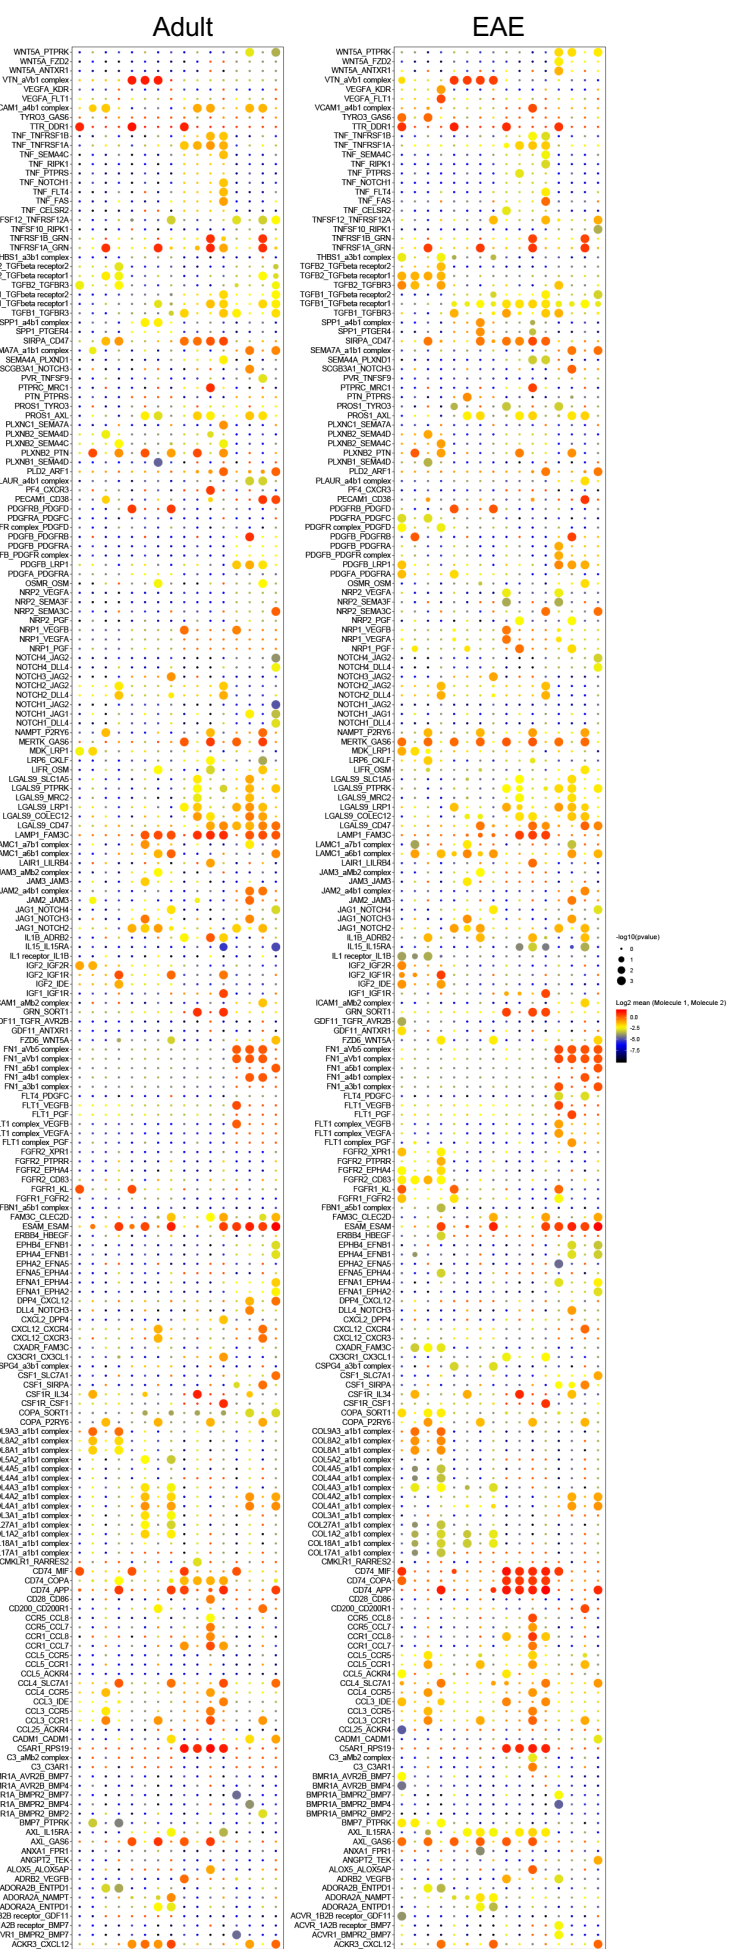

Supplement: supp [file elife-57520-supp-v1.zip]

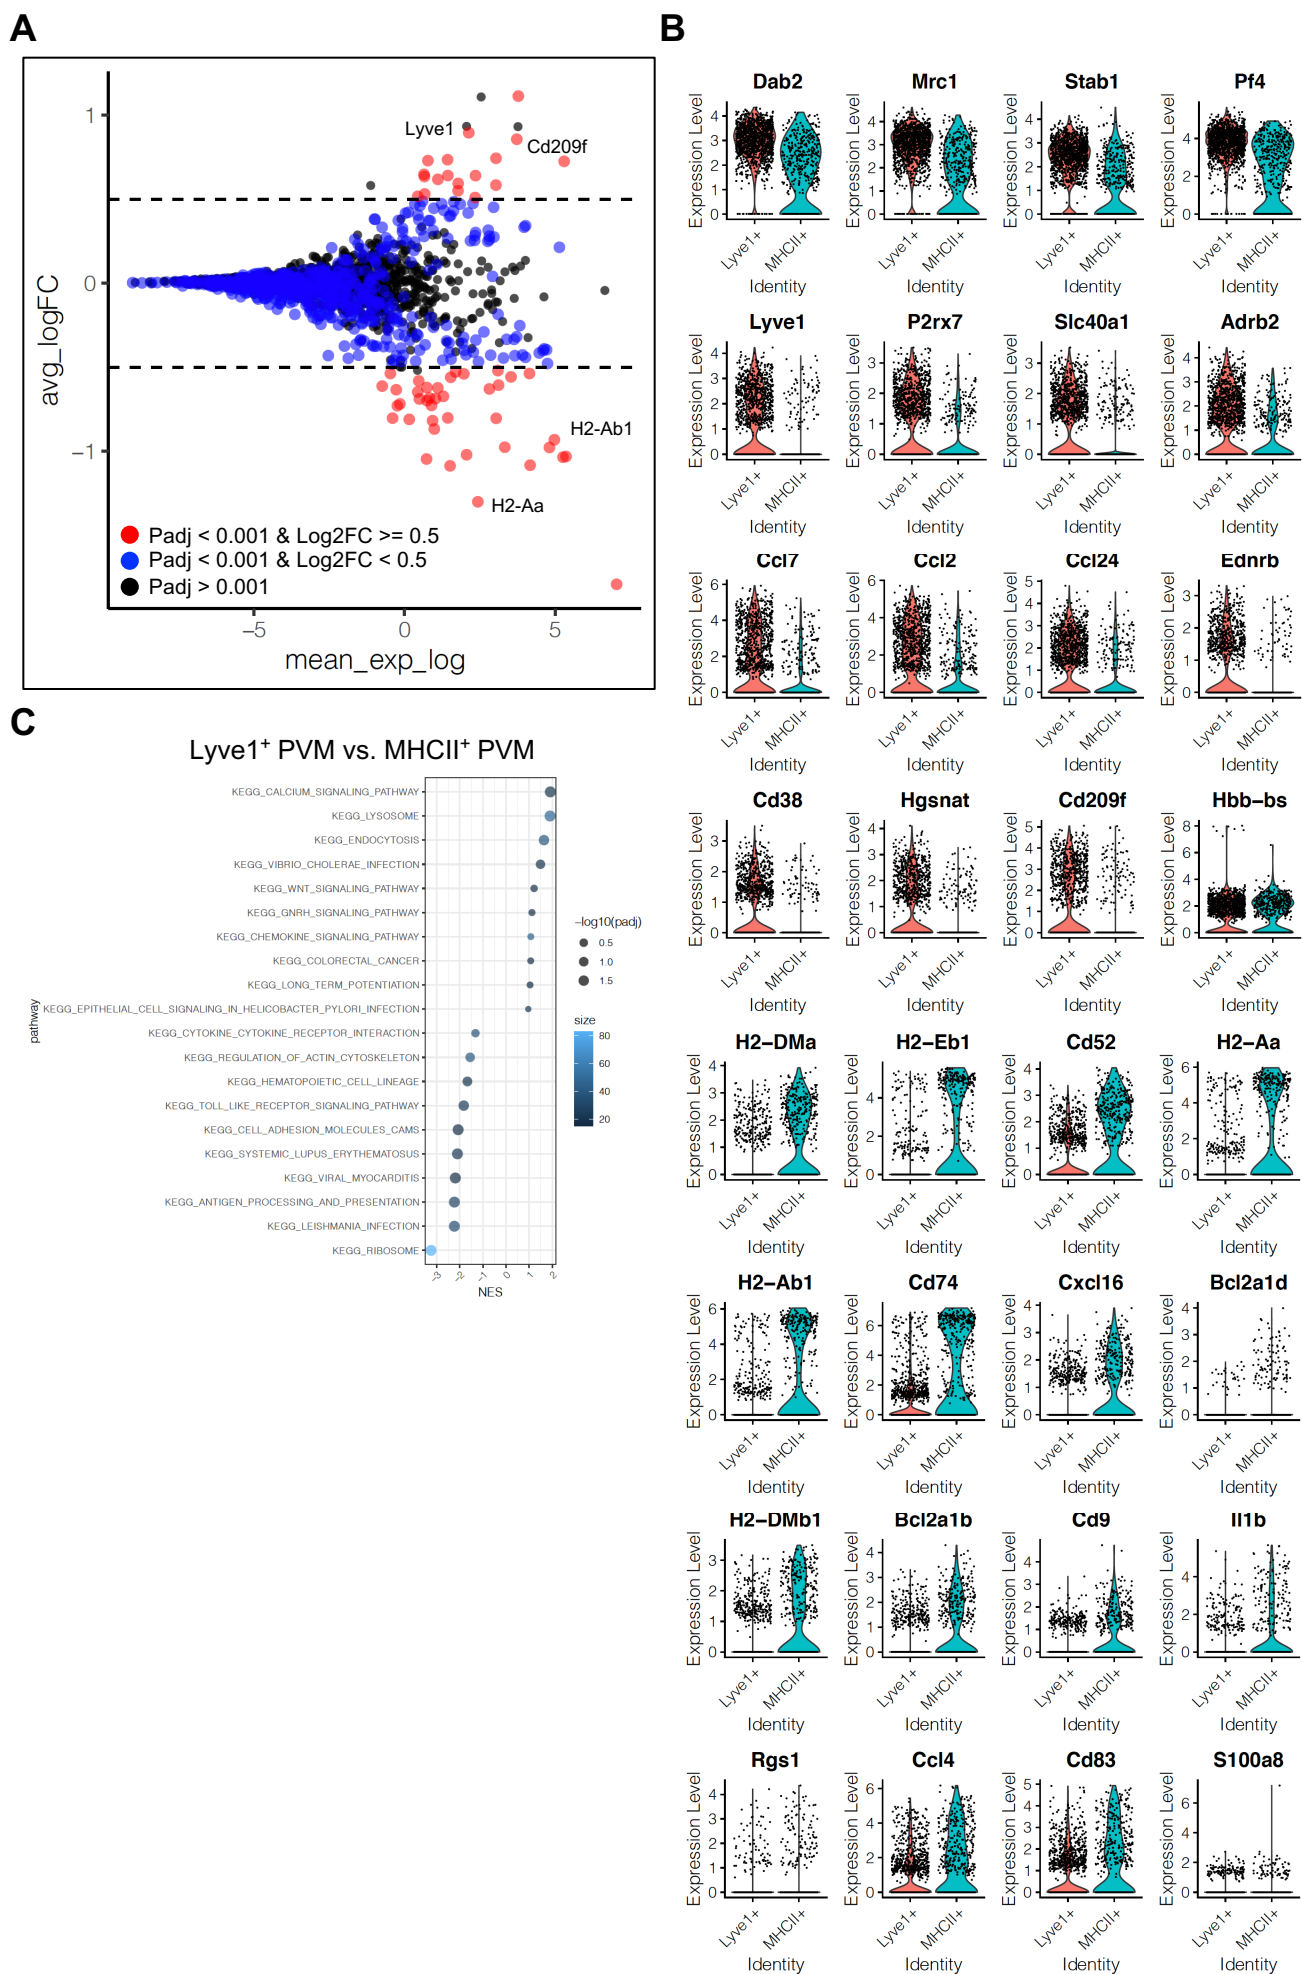

Figure 4-figure supplement 1. Jeong et al.

Supplement: supp [file elife-57520-supp-v1.zip]

**A**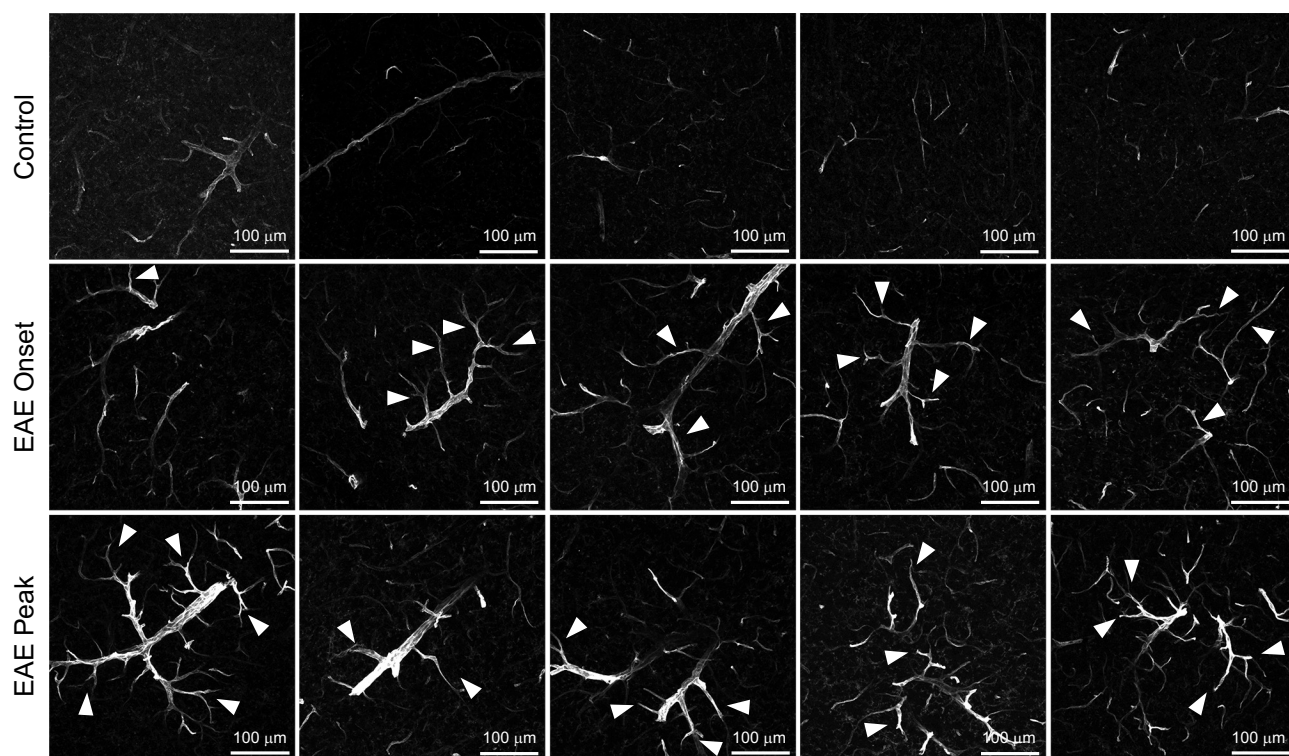**B**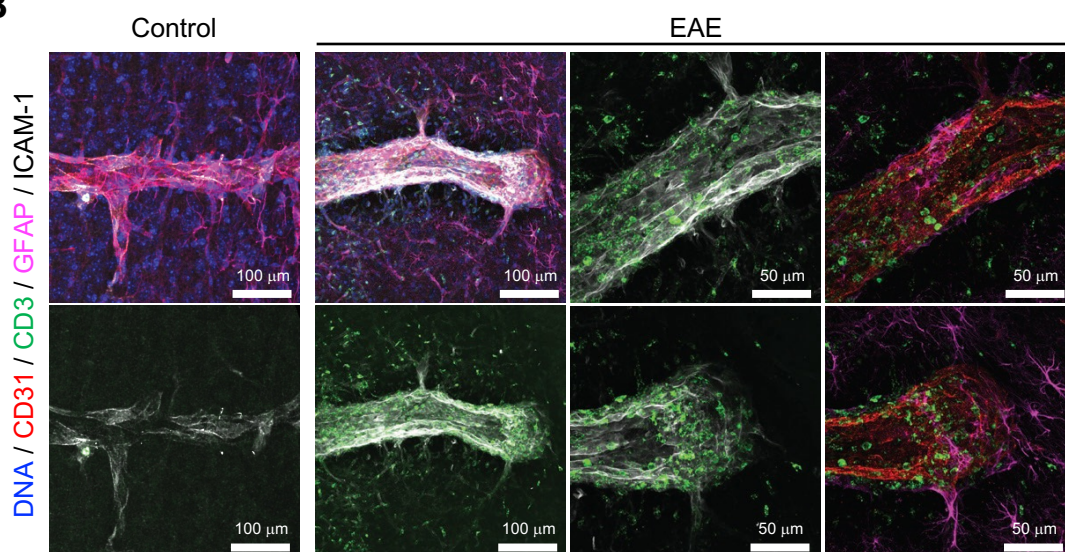**C**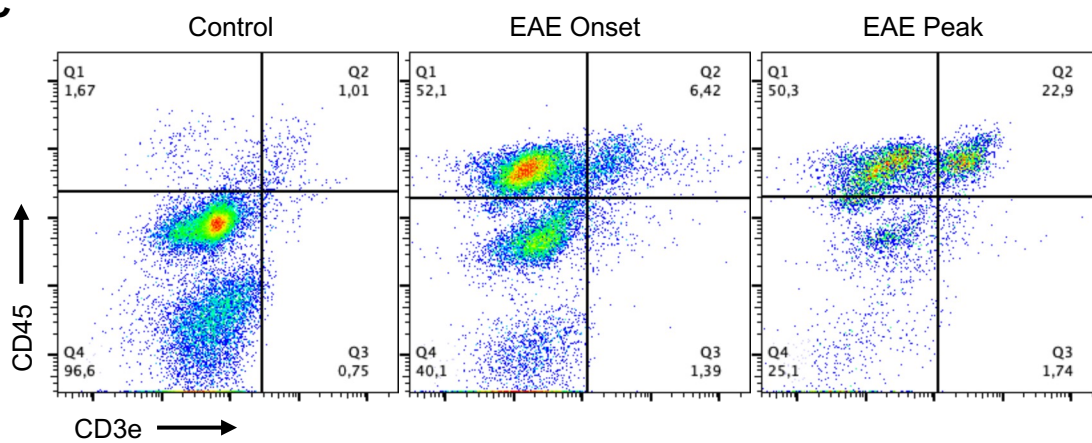

Figure 5-figure supplement 3. Jeong et al.

Supplement: supp [file elife-57520-supp-v1.zip]

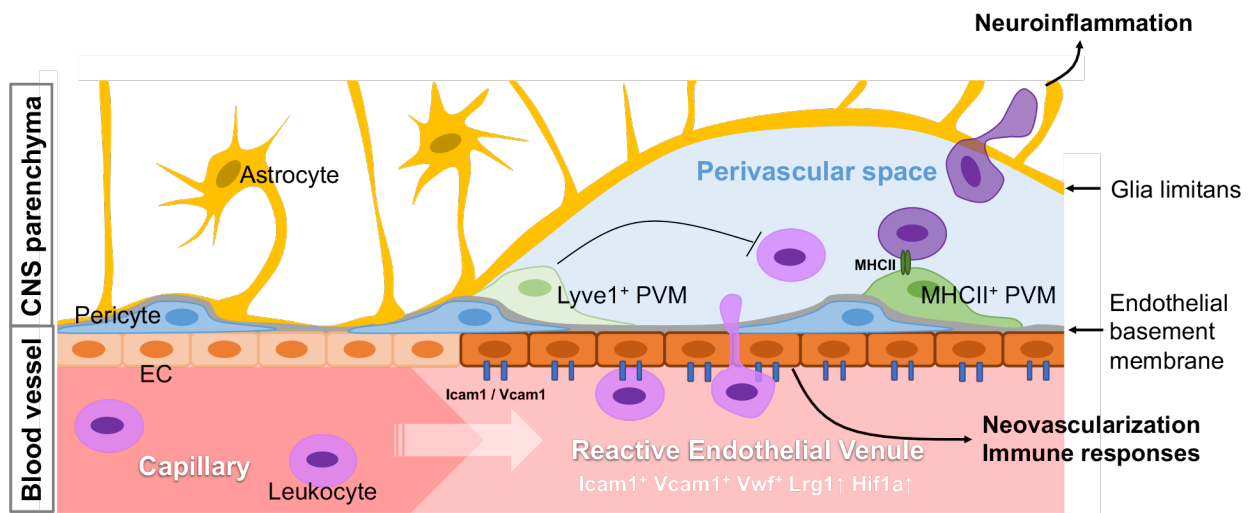

Figure 7-figure supplement 2. Jeong et al.

Supplement: supp [file elife-57520-supp-v1.zip]

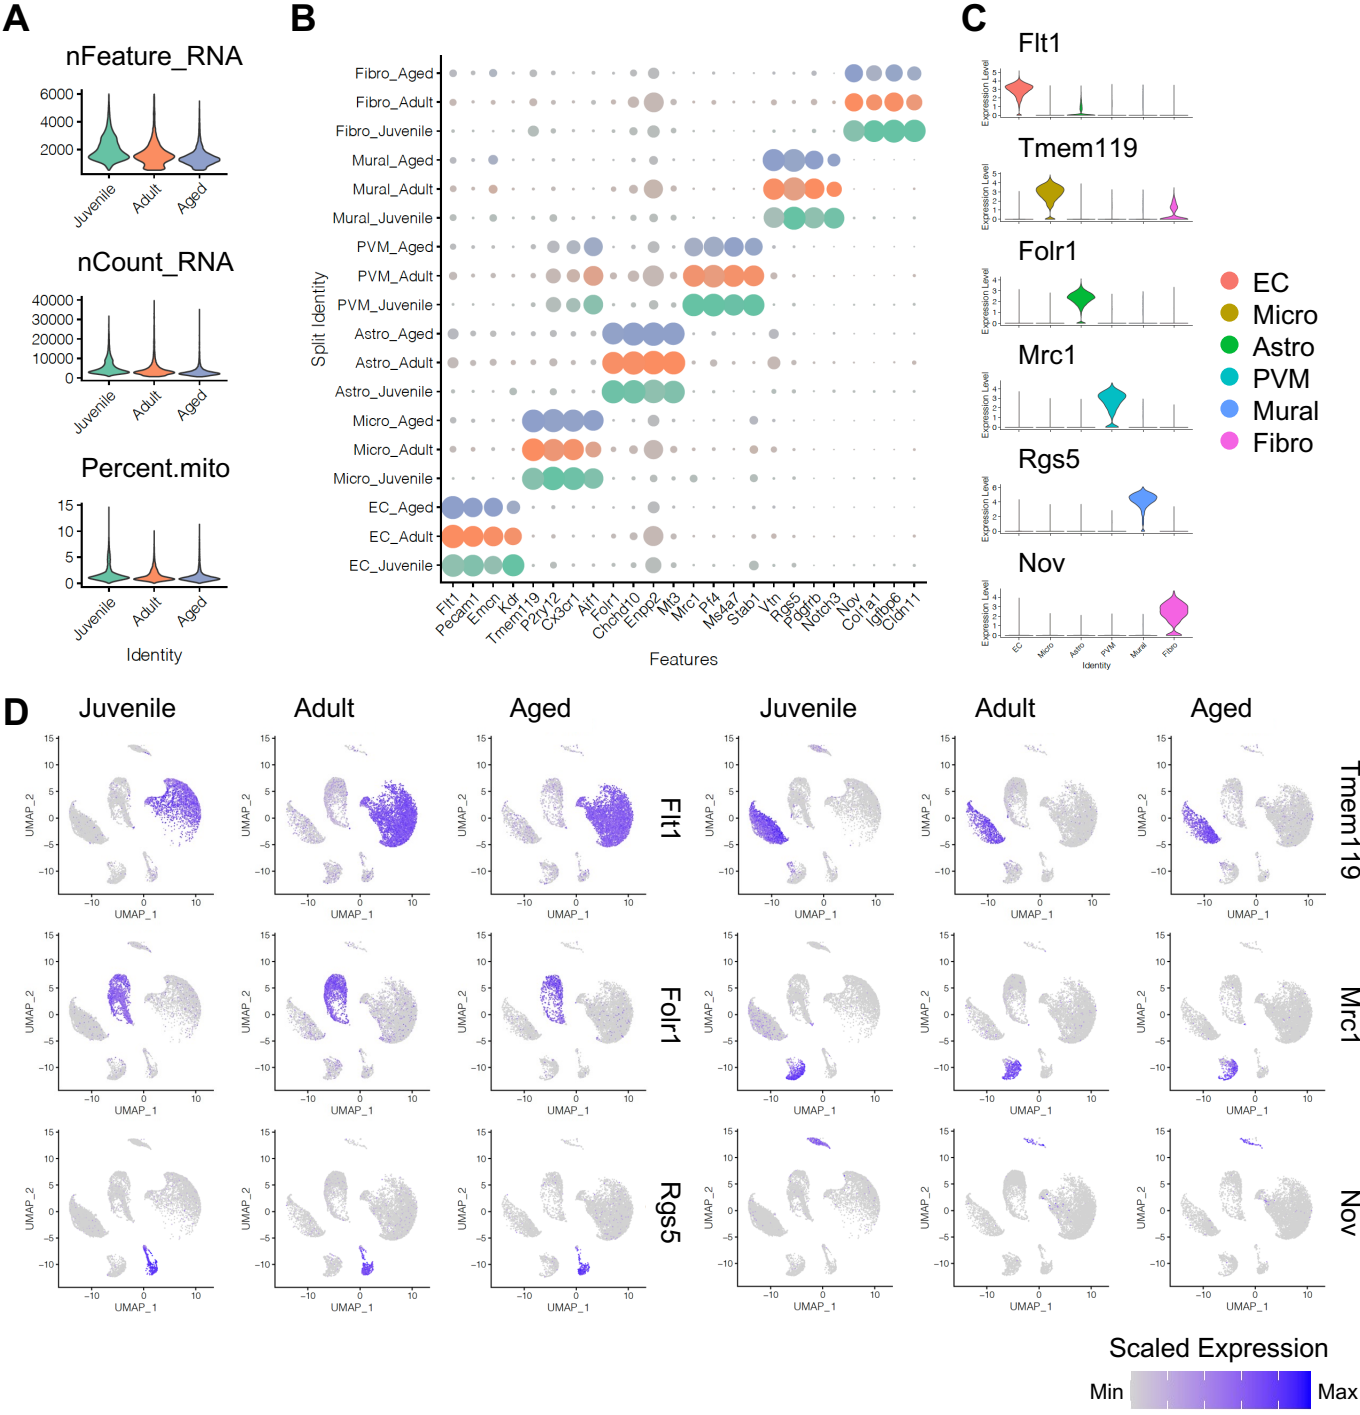

Figure 1-figure supplement 2. Jeong et al.

Supplement: supp [file elife-57520-supp-v1.zip]

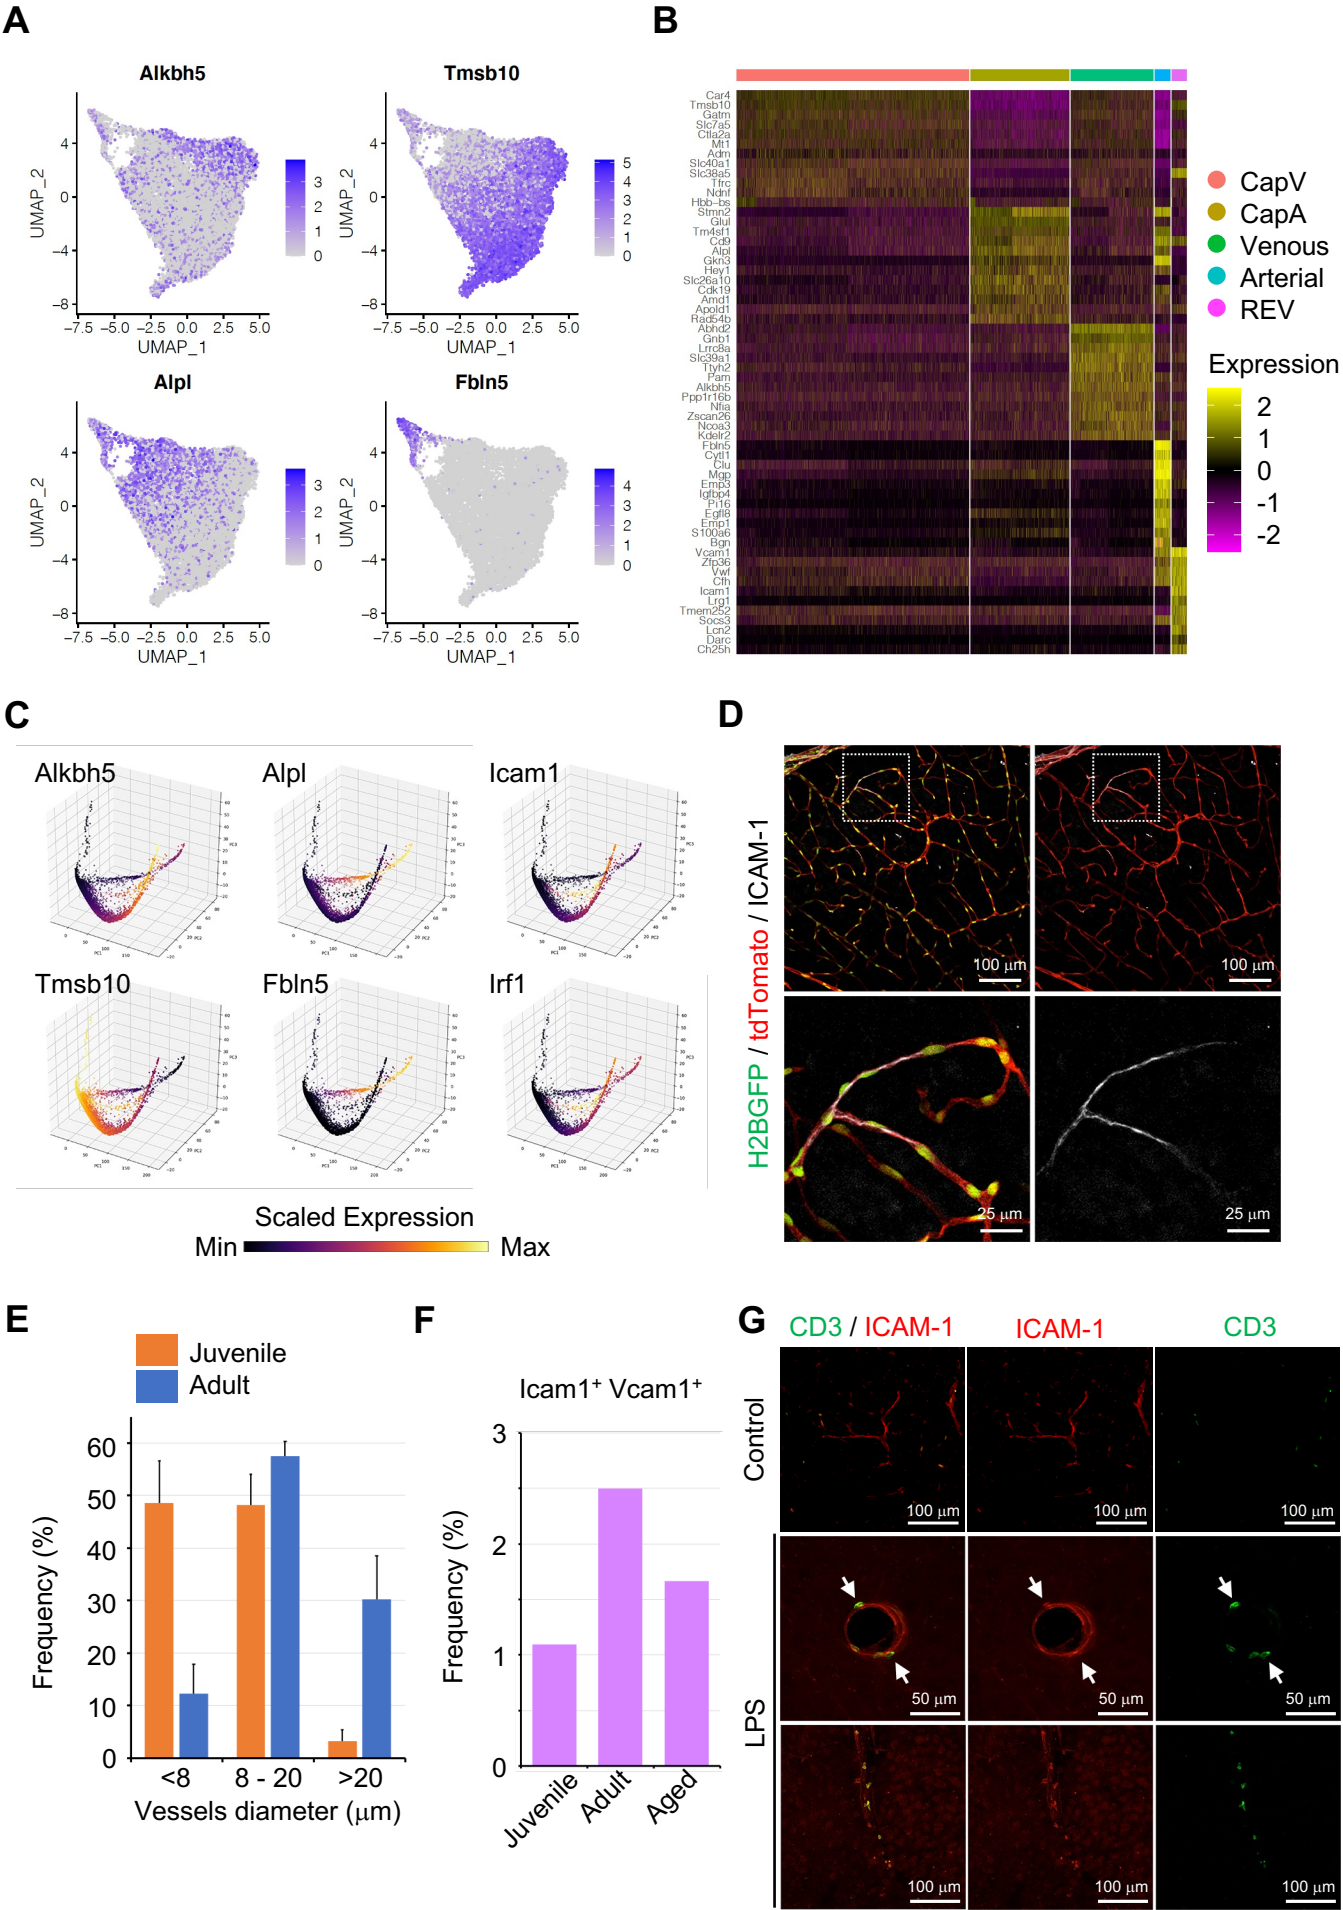

Supplement: supp [file elife-57520-supp-v1.zip]

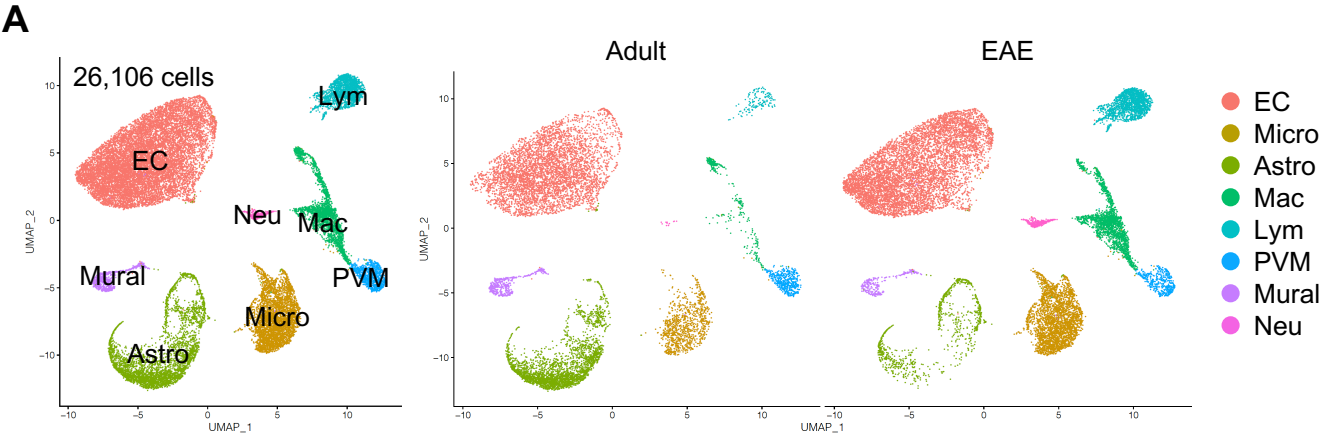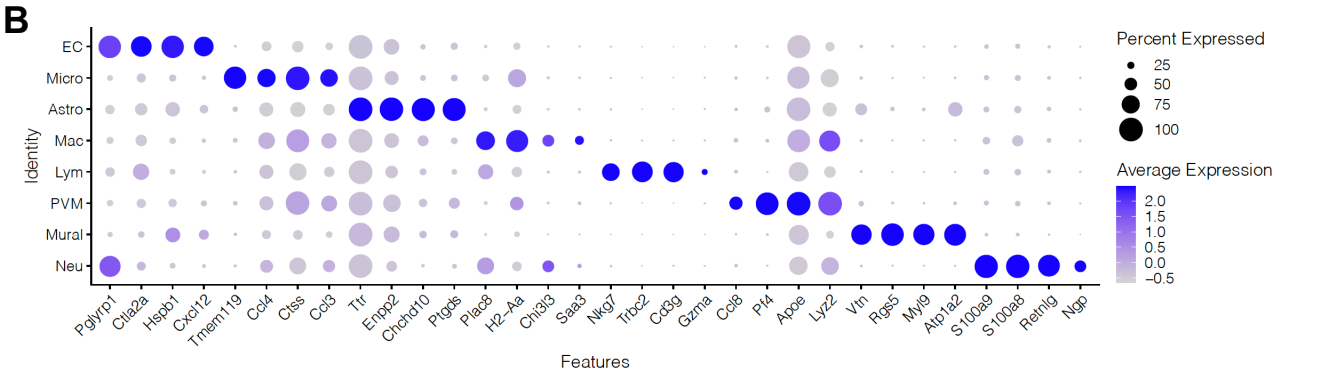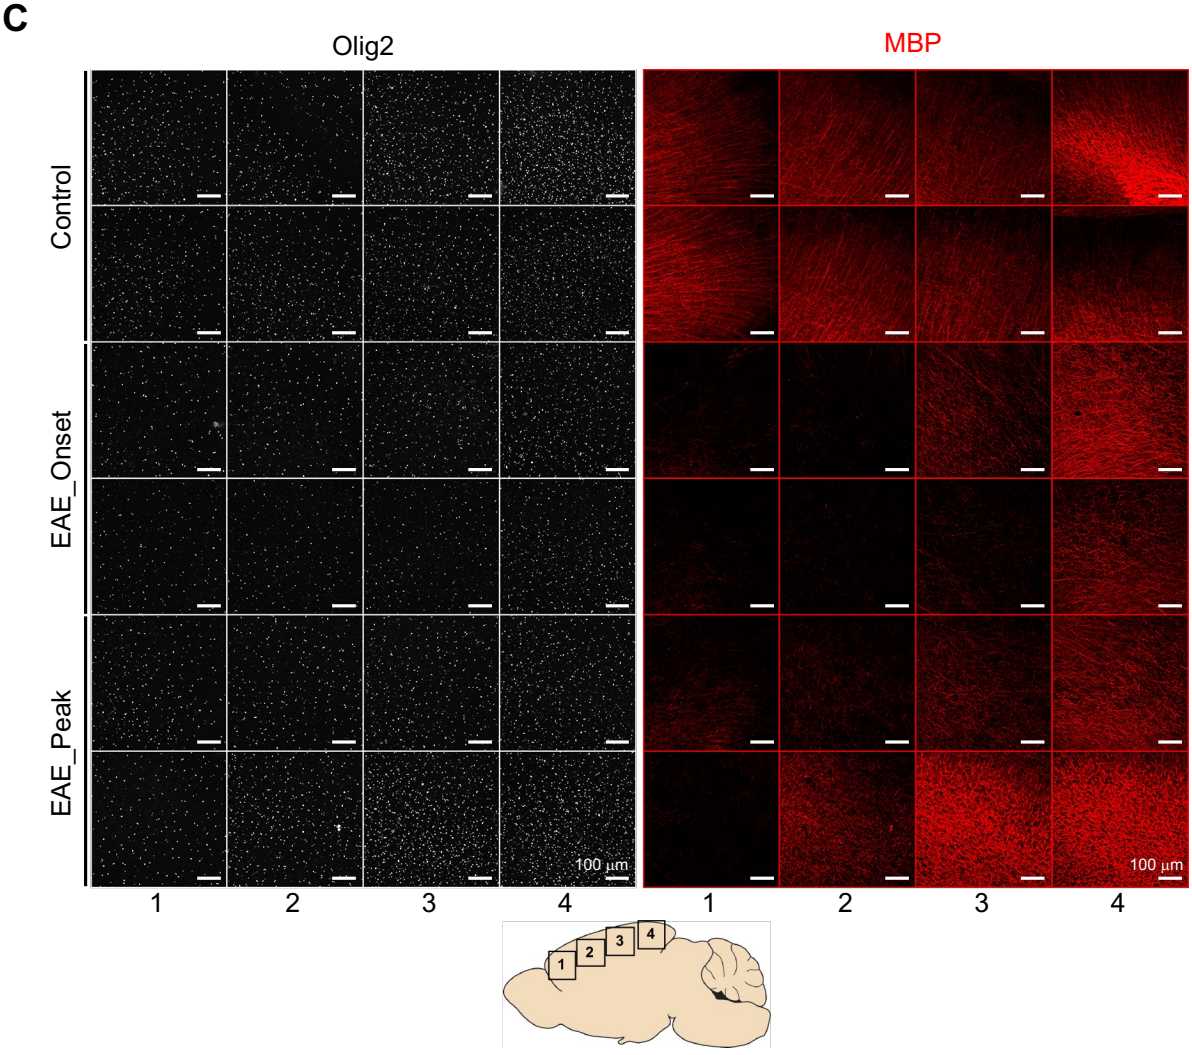

Figure 5-figure supplement 1. Jeong et al.

Supplement: supp [file elife-57520-supp-v1.zip]

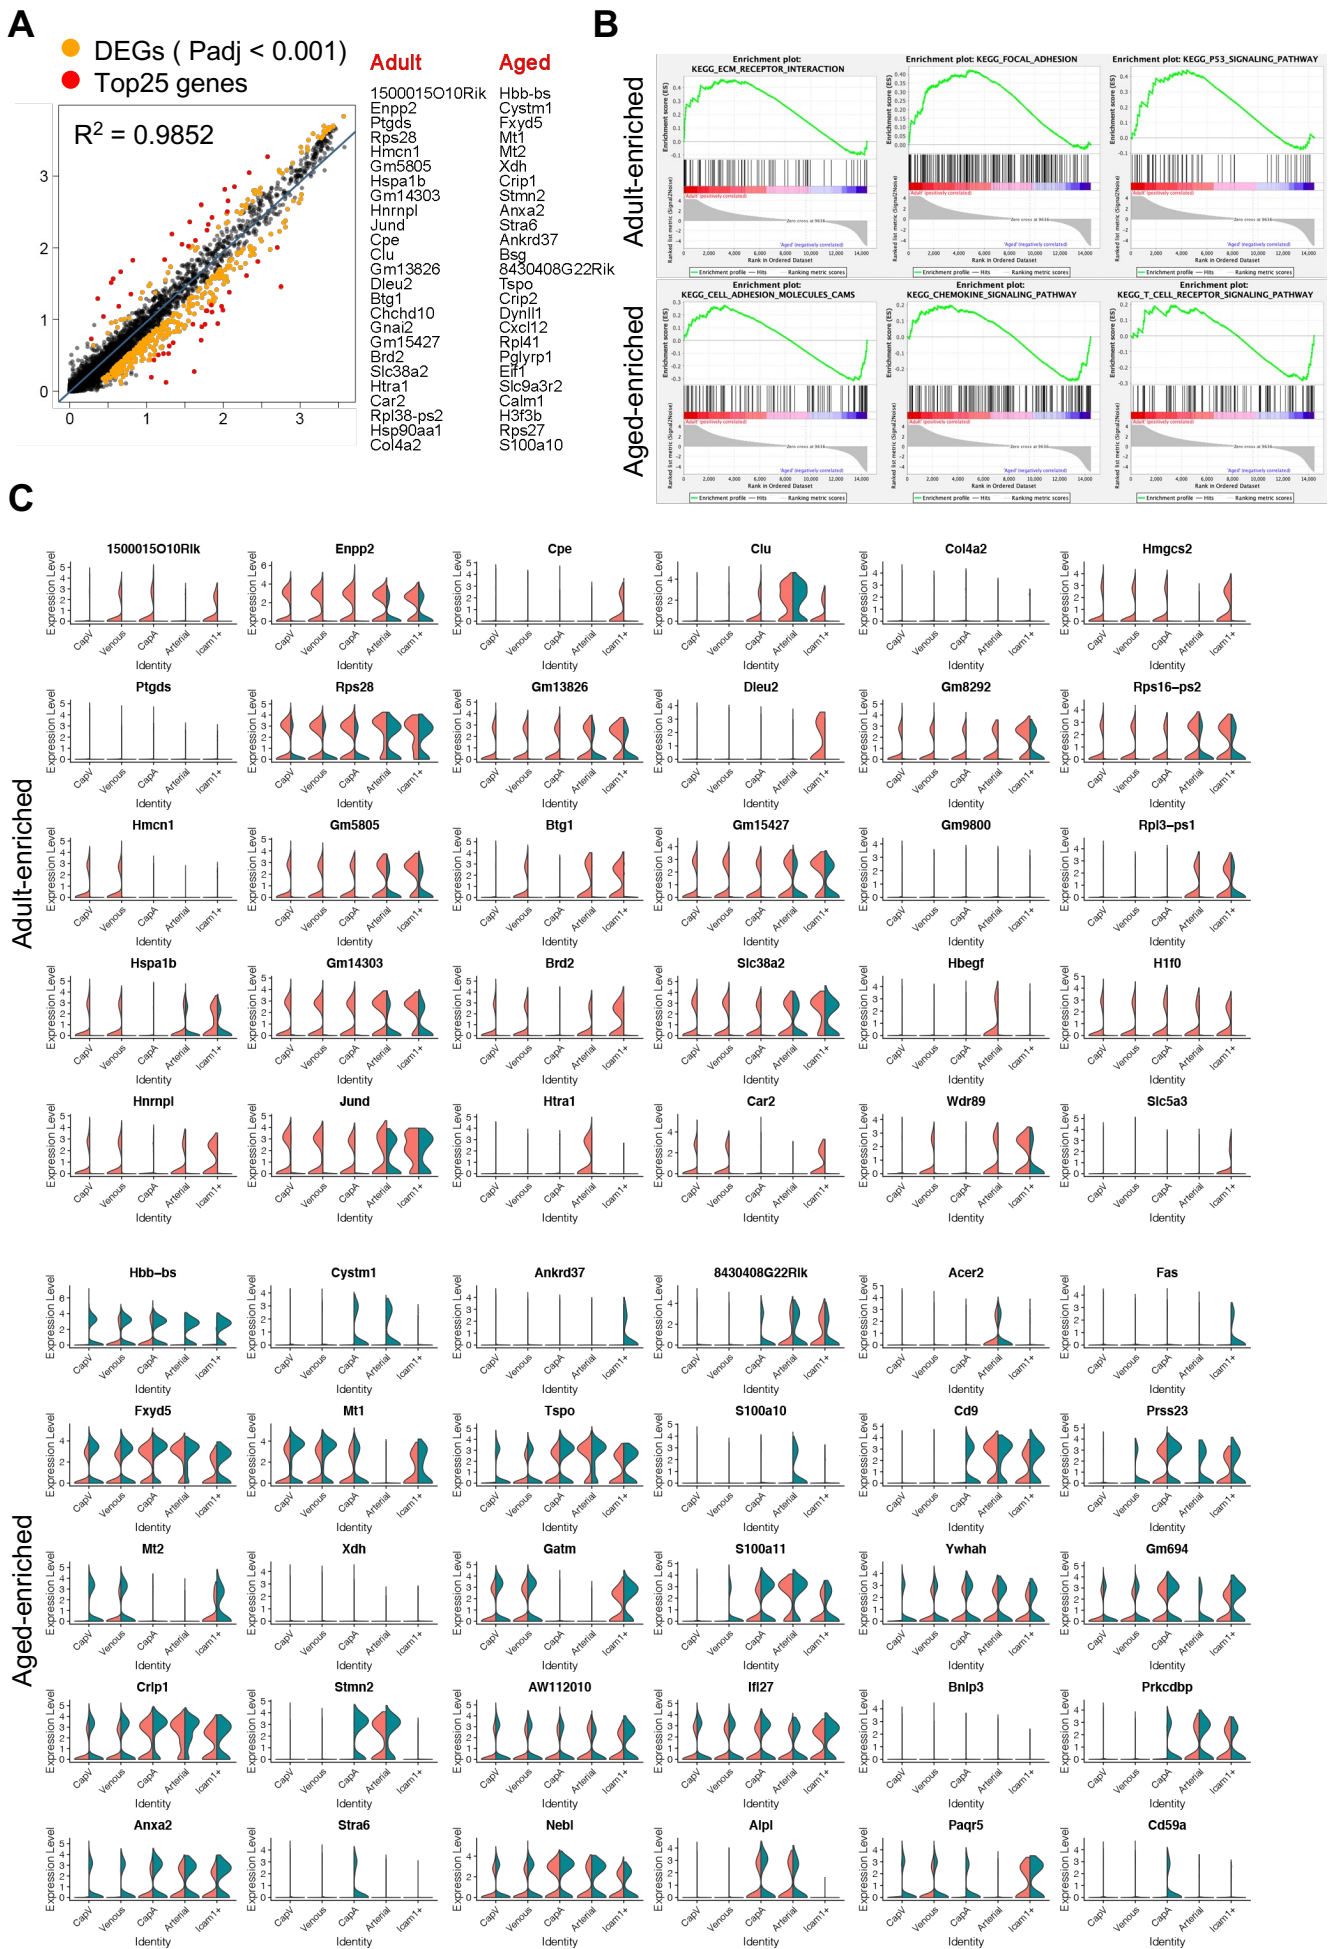

Figure 2-figure supplement 2. Jeong et al.

Supplement: supp [file elife-57520-supp-v1.zip]

**A**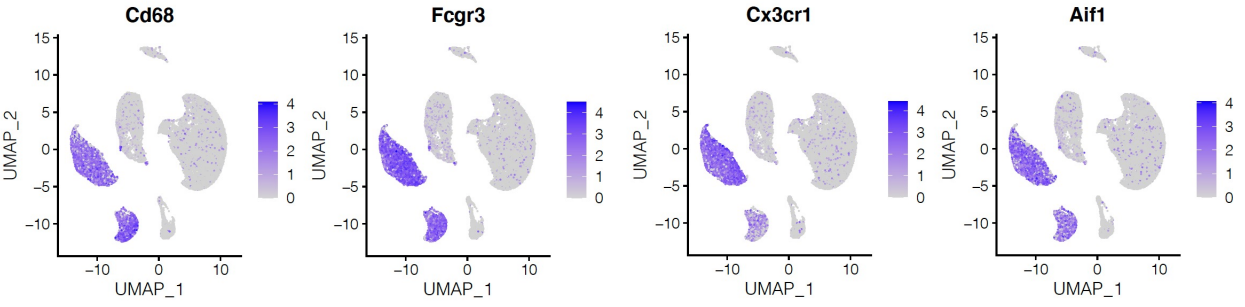**B**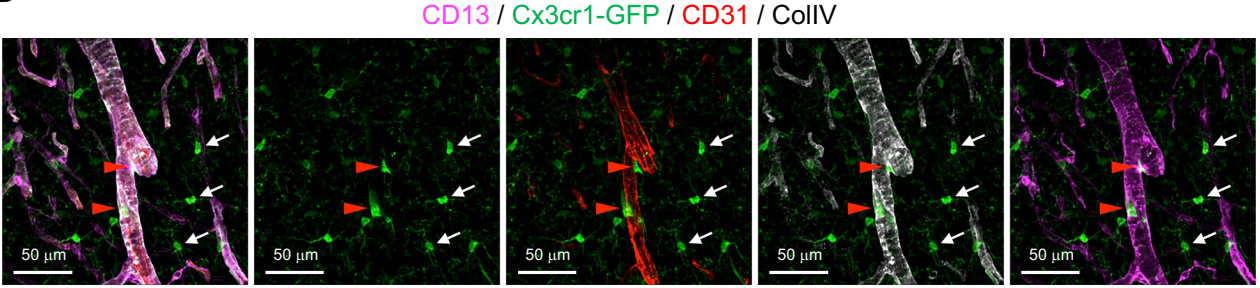**C**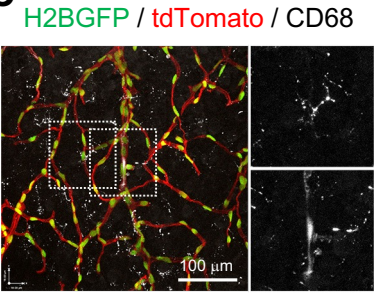**D**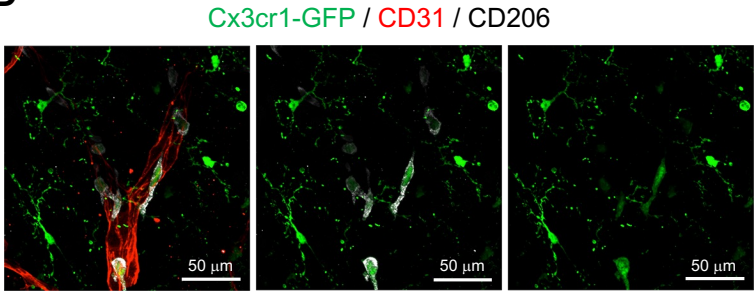

Figure 3-figure supplement 1. Jeong et al.

Supplement: supp [file elife-57520-supp-v1.zip]
